# Supplementary material for: Sequestration of carbon monoxide at room temperature at vacancy sites of graphene
Source: Royal Society of Chemistry journal article supplement (doi:10.1039/c9cc04225c), 2019-01-01
Supplement: c9cc04225c1.pdf [file c9cc04225c1.pdf]

## Supporting Material for publication

### Characterization of graphene/Ru(0001)

As a consequence of the existence of ripples in monolayer graphene on Ru(0001)<sup>1,2</sup>, the LEED pattern shows satellite spots caused by the moiré structure (Figure S1).

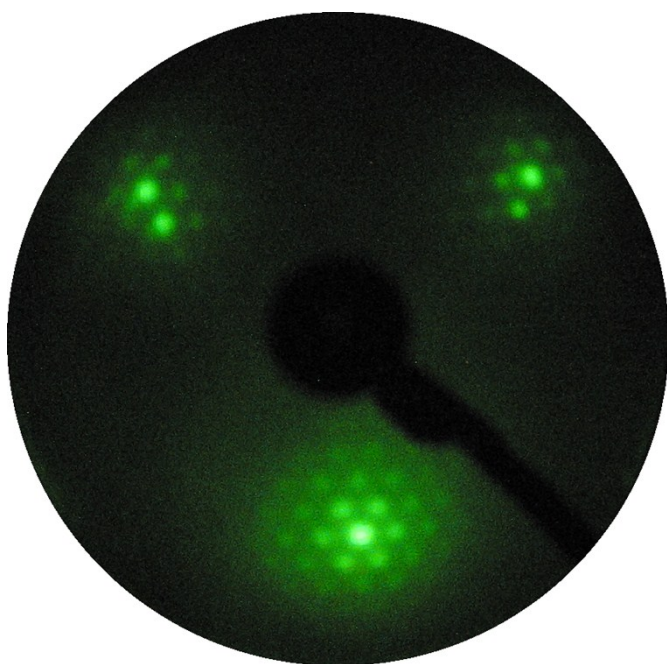

*Figure S1: LEED pattern of graphene on Ru(0001), recorded at  $E_p = 74$  eV and at room temperature.*

Further characterization of the monolayer graphene has been carried out by the measurement of phonon modes (Figure S2). The presence of well-resolved ZA (out-of-plane acoustic), TA (transverse acoustic), LA (longitudinal acoustic), and LO (longitudinal optical) phonons ensures of the good order and crystalline quality of the graphene sheet.

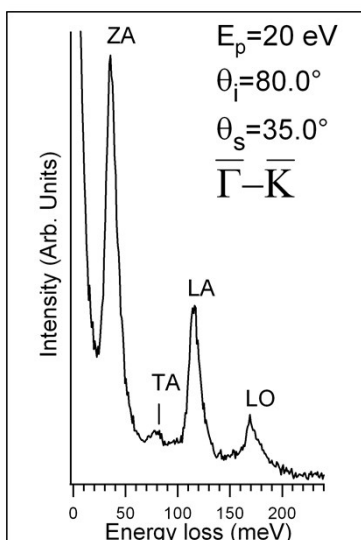

Figure S2: HREEL spectrum of the graphene/Ru(0001) for an impinging energy of 20 eV. The incidence angle is  $80.0^\circ$  while the scattering angle is  $35.0^\circ$ . The sample was oriented along the  $\bar{\Gamma} - \bar{K}$  direction.

As concerns the microscopic investigation of air-exposed graphene/Ru(0001), the reader is referred to the previous complete study in Ref. <sup>2</sup> by Politano et al.

## S2. Identification of the optimal etching temperature for CO stable adsorption

To complement Figure 1 in the main text, we report in Fig. S3 the intensity of the C-O stretching vibration for different etching temperatures. The maximum CO-derived signal is at 670 K.

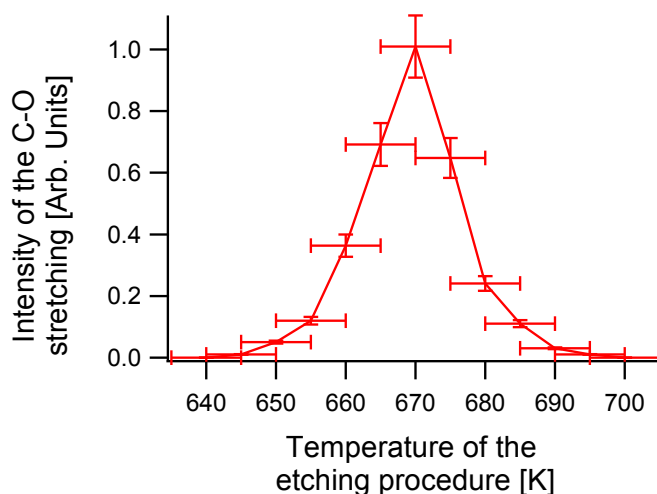

Figure S3: Intensity of the C-O stretching vibration as a function of the temperature of the etching temperature.

### S3. Technical details of calculations

The energy mesh cut-off was 360 Ry in a  $4 \times 4 \times 2$  k-point mesh using the Monkhorst–Pack scheme<sup>3</sup>. In the optimization, the electronic ground state was found to be self-consistent using norm-conserving pseudopotentials<sup>4</sup> for cores; a double- $\zeta$  plus polarization basis of localized orbitals for ruthenium, carbon, and oxygen; and a double- $\zeta$  basis for hydrogen. Optimization of bond lengths and total energies were performed with an accuracy of 0.04 eV/Å and 1 meV, respectively.

### S4. Testing validity of the used approaches

Firstly, we check the effect of the increase of the exactness of the calculations by decreasing the criteria of accuracy to 0.001 eV/Å and 0.1 meV. Successively, we performed the calculations for different types of van der Waals corrections. For all these checks, we study adsorption of the CO molecule on graphene with four-vacancy on Ru(0001). Results of the calculations are reported in the table:

| Reference for used vdW functional                                                                         | Graphene-CO distance, Å | Adsorption Energy, eV | Frequency, meV |
|-----------------------------------------------------------------------------------------------------------|-------------------------|-----------------------|----------------|
| M. Dion, H. Rydberg, E. Schroder, D. C. Langreth, and B. I. Lundqvist, Phys. Rev. Lett. 92, 246401 (2004) | 2.68                    | -0.821                | 158            |
| K. Lee, E. Murray, L. Kong, B. I. Lundqvist and D. C. Langreth, Phys. Rev. B 82, 081101 (2010)            | 2.69                    | -0.810                | 157            |
| J. Klimes, D. R. Bowler, and A. Michaelides, J. Phys.: Condens. Matter 22, 022201 (2010)                  | 2.68                    | -0.815                | 158            |
| V. R. Cooper, Phys. Rev. B 81, 161104 (2010)                                                              | 2.66                    | -0.828                | 160            |
| K. Berland and P. Hyldgaard, Phys. Rev. B 89, 035412 (2014)                                               | 2.68                    | -0.825                | 156            |

|                                                                    |      |         |     |
|--------------------------------------------------------------------|------|---------|-----|
| O. A. Vydrov and T. Van Voorhis, J. Chem. Phys. 133, 244103 (2010) | 2.70 | -0.809  | 150 |
| Improved accuracy                                                  | 2.68 | -0.8218 | 158 |

For the adsorption of CO on pristine graphene we also performed additional calculations by Grimme functional [S. Grimme, J. Comp. Chem. 27, 1787 (2006)] implemented in Quantum-Espresso code. Results of the calculations are shown on the next table:

| Functional and code | Adsorption Energy, eV | Graphene-CO distance, Å |
|---------------------|-----------------------|-------------------------|
| Dion-Siesta         | -0.1873               | 2.70                    |
| Grimme-QE           | -0.2504               | 2.66                    |

Results of the calculations demonstrate that the choice of the functional and further increasing of the accuracy play no role. The cause of this is that the interaction between CO and graphene is dipole-dipole interaction between polar CO molecule and graphene with charge inhomogeneity in vicinity of vacancy additionally doped by metallic substrate and correction that take into account London dispersion forces caused by fluctuation of charge density.

### S5. Adsorption configuration

To find preferable adsorption site, we first check the adsorption energies for different sites in vicinity of the vacancy for the case of the smallest distance between graphene and metallic substrate. Results of the calculations are shown on Fig. S4. For both types of the vacancies there are several sites in vicinity with large magnitude of the adsorption energy. Further we considered only adsorption at the sites with the largest magnitude of adsorption energy.

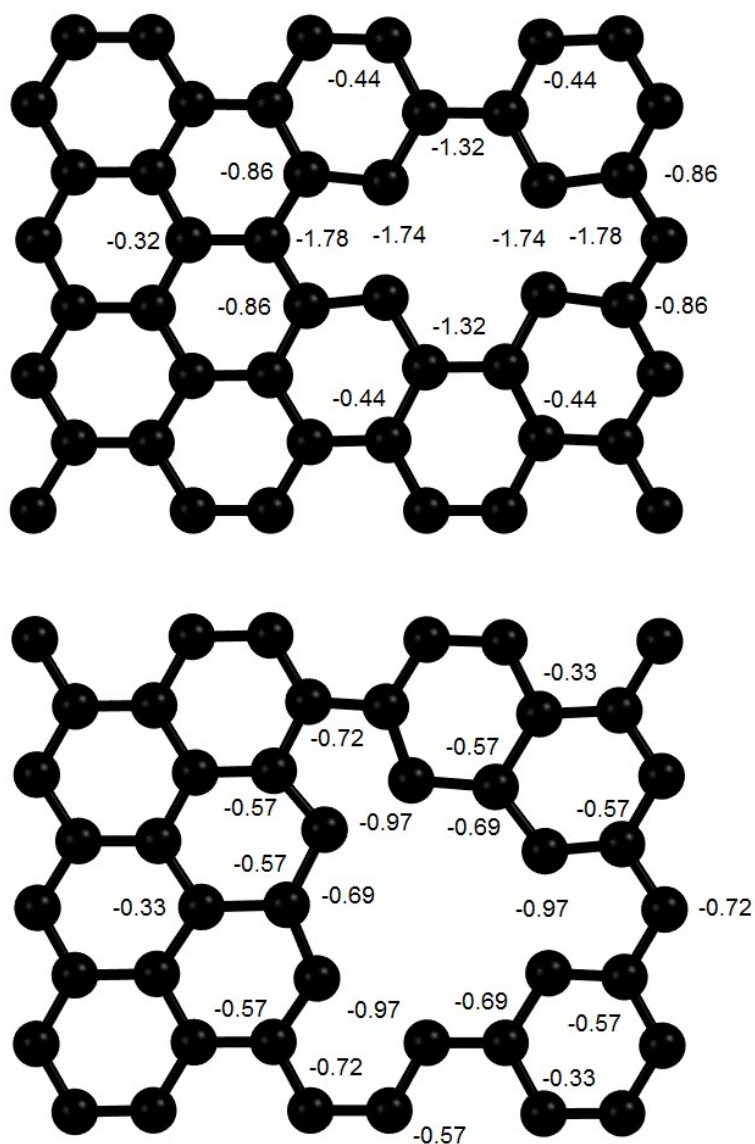

*Figure S4: Adsorption energies for different sites in vicinity of bi- and four-vacancies in graphene on Ru for the shortest distance between graphene and substrate. Values are in eV.*

For these selected sites, we performed two additional checks. The first is the possibility of horizontal adsorption. During the process of optimization of atomic position, CO molecules return to vertical position. The second check is adsorption on the same site with formation of C...C=O bond instead C...O=C. In the case of both vacancies the binding energy was in order of -0.15 eV for the case of shortest distance between graphene and Ru(001). Thus, we excluded these configurations from further consideration.

References

Coordinates of optimized atomic structures.

All coordinates are scaled Cartesian. The lattice parameter is the same as in graphene 2.462 Å.

Lattice vectors of the system are:

```
5.20000000 0.00000000 0.00000000
0.00000000 4.00000000 0.00000000
0.00000000 0.00000000 10.00000000
```

Adsorption on the double vacancy:

1)

```
-0.60684569 0.00000453 -1.03761347 2 1 O
-0.61028181 0.00000893 -1.52972943 1 2 C
-2.28588973 0.00003111 0.01808321 1 3 C
-1.17810698 0.00003020 0.01525822 1 4 C
-0.60079472 0.00001160 0.05458895 1 5 C
2.33229464 -0.00006612 0.04548828 1 6 C
-2.32000054 1.00342729 0.02774096 1 7 C
-1.15334428 1.00494012 0.01334650 1 8 C
-0.57869863 0.99901918 0.02189412 1 9 C
2.30238217 0.99009910 0.03806001 1 10 C
1.16176750 0.93682247 0.08881310 1 11 C
0.56896634 0.94142680 0.07700554 1 12 C
-2.32006489 -1.00339749 0.02772322 1 13 C
-1.15335050 -1.00493903 0.01338016 1 14 C
-0.57869119 -0.99911796 0.02191248 1 15 C
2.30246150 -0.99016661 0.03805396 1 16 C
1.16174532 -0.93679144 0.08879051 1 17 C
0.56900972 -0.94143227 0.07699418 1 18 C
-2.32677440 -1.99995763 0.03178238 1 19 C
-1.14599427 -1.99998646 0.02682430 1 20 C
-0.57508459 -2.00000644 0.03438161 1 21 C
2.29884576 -2.00003876 0.03524135 1 22 C
1.15047468 -1.99997701 0.05599505 1 23 C
0.57803450 -1.99997003 0.04927714 1 24 C
2.03445472 0.47985208 0.07383862 1 25 C
1.44612706 0.40418194 0.12899558 1 26 C
0.27469121 0.42606377 0.06500009 1 27 C
-2.02434246 0.50009530 0.01159310 1 28 C
-1.44429405 0.50189083 0.01519406 1 29 C
-0.30711307 0.48612488 0.04992969 1 30 C
2.00990825 1.48992201 0.04730422 1 31 C
1.42728198 1.46580898 0.05276761 1 32 C
0.29456885 1.47845464 0.05753376 1 33 C
-2.02356724 1.49772932 0.02111277 1 34 C
-1.45287992 1.49933341 0.02617042 1 35 C
-0.28239681 1.49355111 0.02620228 1 36 C
2.03443834 -0.47973793 0.07385093 1 37 C
1.44613659 -0.40421296 0.12899038 1 38 C
0.27462757 -0.42600667 0.06487323 1 39 C
-2.02426134 -0.50009399 0.01161793 1 40 C
-1.44435967 -0.50184945 0.01524680 1 41 C
-0.30703803 -0.48604300 0.04993263 1 42 C
2.00989157 -1.48983528 0.04730112 1 43 C
1.42728505 -1.46579310 0.05275653 1 44 C
0.29457860 -1.47844918 0.05754536 1 45 C
```

|             |             |            |   |     |    |
|-------------|-------------|------------|---|-----|----|
| -2.02353740 | -1.49775101 | 0.02109272 | 1 | 46  | C  |
| -1.45286827 | -1.49928426 | 0.02617652 | 1 | 47  | C  |
| -0.28243984 | -1.49344586 | 0.02618924 | 1 | 48  | C  |
| -2.30148622 | -0.00003979 | 1.14002208 | 3 | 49  | Ru |
| -0.54455108 | 0.00000492  | 1.13209845 | 3 | 50  | Ru |
| 1.18964935  | -0.00001486 | 0.83304106 | 3 | 51  | Ru |
| -2.30431560 | 0.99674567  | 1.09906868 | 3 | 52  | Ru |
| -0.56679829 | 0.99729594  | 1.13378908 | 3 | 53  | Ru |
| 1.15037923  | 0.98610655  | 1.07662466 | 3 | 54  | Ru |
| -2.30424115 | -0.99675046 | 1.09954934 | 3 | 55  | Ru |
| -0.56678872 | -0.99731906 | 1.13379052 | 3 | 56  | Ru |
| 1.15028123  | -0.98605443 | 1.07694229 | 3 | 57  | Ru |
| -2.30757659 | -1.99999396 | 1.10207487 | 3 | 58  | Ru |
| -0.58000544 | -2.00001763 | 1.11405416 | 3 | 59  | Ru |
| 1.15796217  | -1.99997972 | 1.08848765 | 3 | 60  | Ru |
| 2.02458412  | 0.49688319  | 1.11897937 | 3 | 61  | Ru |
| 0.28886301  | 0.50817701  | 0.88148904 | 3 | 62  | Ru |
| -1.43226658 | 0.49640291  | 1.09565842 | 3 | 63  | Ru |
| 2.02481245  | 1.49794183  | 1.08339970 | 3 | 64  | Ru |
| 0.28544167  | 1.49793823  | 1.10439314 | 3 | 65  | Ru |
| -1.43748645 | 1.49684372  | 1.07052382 | 3 | 66  | Ru |
| 2.02450149  | -0.49689129 | 1.11896493 | 3 | 67  | Ru |
| 0.28882394  | -0.50819835 | 0.88138911 | 3 | 68  | Ru |
| -1.43224538 | -0.49640090 | 1.09539497 | 3 | 69  | Ru |
| 2.02471450  | -1.49792484 | 1.08340063 | 3 | 70  | Ru |
| 0.28537796  | -1.49797826 | 1.10437059 | 3 | 71  | Ru |
| -1.43754978 | -1.49683960 | 1.07058688 | 3 | 72  | Ru |
| 2.31323431  | -0.00000918 | 2.04191986 | 3 | 73  | Ru |
| 0.57527693  | -0.00002885 | 1.84938133 | 3 | 74  | Ru |
| -1.14690378 | -0.00002484 | 1.99651418 | 3 | 75  | Ru |
| 2.30792107  | 1.00052397  | 2.02111681 | 3 | 76  | Ru |
| 0.58329896  | 0.99606919  | 2.03249935 | 3 | 77  | Ru |
| -1.15021522 | 1.00180731  | 2.01816552 | 3 | 78  | Ru |
| 2.30791875  | -1.00049697 | 2.02110534 | 3 | 79  | Ru |
| 0.58337345  | -0.99606921 | 2.03282330 | 3 | 80  | Ru |
| -1.15021570 | -1.00191303 | 2.01797387 | 3 | 81  | Ru |
| 2.30575500  | -2.00000043 | 2.03159935 | 3 | 82  | Ru |
| 0.58522208  | -2.00002232 | 2.02542334 | 3 | 83  | Ru |
| -1.15420258 | -2.00004309 | 2.01742831 | 3 | 84  | Ru |
| -2.01963392 | 0.50041613  | 2.02737871 | 3 | 85  | Ru |
| -0.28671516 | 0.49968141  | 2.04116251 | 3 | 86  | Ru |
| 1.43583073  | 0.49148892  | 2.03067609 | 3 | 87  | Ru |
| -2.02228822 | 1.50121424  | 2.02546170 | 3 | 88  | Ru |
| -0.28873909 | 1.50107580  | 2.01945534 | 3 | 89  | Ru |
| 1.44402935  | 1.49555354  | 1.95448008 | 3 | 90  | Ru |
| -2.01966780 | -0.50040479 | 2.02737536 | 3 | 91  | Ru |
| -0.28675185 | -0.49973447 | 2.04121598 | 3 | 92  | Ru |
| 1.43583788  | -0.49148590 | 2.03066388 | 3 | 93  | Ru |
| -2.02230237 | -1.50126220 | 2.02551403 | 3 | 94  | Ru |
| -0.28874345 | -1.50109881 | 2.01944510 | 3 | 95  | Ru |
| 1.44403886  | -1.49562403 | 1.95455845 | 3 | 96  | Ru |
| -2.30706929 | -0.00000900 | 3.00941926 | 3 | 97  | Ru |
| -0.57087366 | 0.00001643  | 3.03851097 | 3 | 98  | Ru |
| 1.15639582  | 0.00000933  | 3.01964542 | 3 | 99  | Ru |
| -2.30983345 | 0.99902287  | 2.95661239 | 3 | 100 | Ru |
| -0.57167971 | 0.99558519  | 3.02545876 | 3 | 101 | Ru |
| 1.15270637  | 1.00217835  | 3.00346311 | 3 | 102 | Ru |
| -2.30985650 | -0.99897100 | 2.95668534 | 3 | 103 | Ru |
| -0.57169701 | -0.99560627 | 3.02550270 | 3 | 104 | Ru |
| 1.15268971  | -1.00216904 | 3.00347526 | 3 | 105 | Ru |
| -2.31194648 | -1.99999770 | 2.96258885 | 3 | 106 | Ru |
| -0.57218562 | -1.99998677 | 3.01187865 | 3 | 107 | Ru |

|             |             |            |   |     |    |
|-------------|-------------|------------|---|-----|----|
| 1.15174356  | -1.99999288 | 2.99967838 | 3 | 108 | Ru |
| 2.01916723  | 0.50145011  | 2.91719569 | 3 | 109 | Ru |
| 0.29677636  | 0.49198313  | 2.88175819 | 3 | 110 | Ru |
| -1.43382577 | 0.49859719  | 2.91763223 | 3 | 111 | Ru |
| 2.01687612  | 1.50126667  | 2.95060227 | 3 | 112 | Ru |
| 0.28906128  | 1.49770146  | 2.90104618 | 3 | 113 | Ru |
| -1.43751568 | 1.49924847  | 2.93228794 | 3 | 114 | Ru |
| 2.01917027  | -0.50142663 | 2.91718834 | 3 | 115 | Ru |
| 0.29678010  | -0.49197242 | 2.88177212 | 3 | 116 | Ru |
| -1.43378175 | -0.49865973 | 2.91715533 | 3 | 117 | Ru |
| 2.01685201  | -1.50124208 | 2.95061516 | 3 | 118 | Ru |
| 0.28905043  | -1.49772770 | 2.90104256 | 3 | 119 | Ru |
| -1.43750123 | -1.49929605 | 2.93233857 | 3 | 120 | Ru |
| 2.30849850  | 0.00000587  | 3.86719409 | 3 | 121 | Ru |
| 0.57597160  | 0.00000368  | 3.87710030 | 3 | 122 | Ru |
| -1.15589299 | -0.00001398 | 3.91092676 | 3 | 123 | Ru |
| 2.30992307  | 1.00202486  | 3.87308226 | 3 | 124 | Ru |
| 0.57759913  | 0.99832634  | 3.87897011 | 3 | 125 | Ru |
| -1.15504754 | 0.99931757  | 3.90617040 | 3 | 126 | Ru |
| 2.30990807  | -1.00203363 | 3.87307758 | 3 | 127 | Ru |
| 0.57759357  | -0.99831020 | 3.87898923 | 3 | 128 | Ru |
| -1.15505738 | -0.99933063 | 3.90620277 | 3 | 129 | Ru |
| 2.31027318  | -2.00000243 | 3.88922790 | 3 | 130 | Ru |
| 0.57935734  | -1.99999609 | 3.87461319 | 3 | 131 | Ru |
| -1.15478815 | -1.99999990 | 3.89231210 | 3 | 132 | Ru |
| -2.02640008 | 0.49965889  | 3.88049949 | 3 | 133 | Ru |
| -0.28928346 | 0.50061336  | 3.92454358 | 3 | 134 | Ru |
| 1.44284401  | 0.49870198  | 3.90694740 | 3 | 135 | Ru |
| -2.02259420 | 1.50193233  | 3.87336167 | 3 | 136 | Ru |
| -0.28680655 | 1.49947330  | 3.90276853 | 3 | 137 | Ru |
| 1.44373118  | 1.49995995  | 3.91731665 | 3 | 138 | Ru |
| -2.02638815 | -0.49965177 | 3.88050116 | 3 | 139 | Ru |
| -0.28926289 | -0.50059519 | 3.92455849 | 3 | 140 | Ru |
| 1.44282461  | -0.49866751 | 3.90695756 | 3 | 141 | Ru |
| -2.02260946 | -1.50192198 | 3.87338256 | 3 | 142 | Ru |
| -0.28680397 | -1.49944421 | 3.90281292 | 3 | 143 | Ru |
| 1.44373305  | -1.49996186 | 3.91733001 | 3 | 144 | Ru |

2)

|             |             |             |   |    |   |
|-------------|-------------|-------------|---|----|---|
| -0.60057774 | -0.00000947 | -1.13066958 | 2 | 1  | O |
| -0.61499456 | 0.00000784  | -1.63469537 | 1 | 2  | C |
| -2.30889879 | 0.00001922  | -0.05158776 | 1 | 3  | C |
| -1.15417709 | 0.00000048  | -0.03945090 | 1 | 4  | C |
| -0.58944369 | -0.00001002 | -0.10607695 | 1 | 5  | C |
| 2.32156988  | -0.00001938 | -0.04424895 | 1 | 6  | C |
| -2.31416935 | 0.99785441  | -0.06631542 | 1 | 7  | C |
| -1.15010778 | 1.00626766  | -0.06407486 | 1 | 8  | C |
| -0.58112330 | 1.00463667  | -0.10948567 | 1 | 9  | C |
| 2.31473094  | 0.99233350  | -0.05739914 | 1 | 10 | C |
| 1.15971794  | 0.99084516  | 0.02238012  | 1 | 11 | C |
| 0.57331883  | 0.96679586  | -0.06654665 | 1 | 12 | C |
| -2.31419853 | -0.99772639 | -0.06585049 | 1 | 13 | C |
| -1.15001273 | -1.00621139 | -0.06417828 | 1 | 14 | C |
| -0.58110830 | -1.00457745 | -0.10959378 | 1 | 15 | C |
| 2.31468209  | -0.99235770 | -0.05723340 | 1 | 16 | C |
| 1.15972912  | -0.99089547 | 0.02230124  | 1 | 17 | C |
| 0.57333194  | -0.96682233 | -0.06649097 | 1 | 18 | C |
| -2.31323587 | -1.99999960 | -0.08304128 | 1 | 19 | C |
| -1.15273162 | -2.00006321 | -0.06477736 | 1 | 20 | C |
| -0.57806518 | -2.00000189 | -0.08253929 | 1 | 21 | C |
| 2.31184076  | -2.00000179 | 0.00152358  | 1 | 22 | C |
| 1.15021749  | -1.99989351 | 0.00413051  | 1 | 23 | C |



|             |             |             |   |    |    |
|-------------|-------------|-------------|---|----|----|
| 0.57727111  | -1.99998062 | 0.00771898  | 1 | 24 | C  |
| 2.03075652  | 0.49891659  | -0.02909283 | 1 | 25 | C  |
| 1.46945367  | 0.50911345  | 0.09824486  | 1 | 26 | C  |
| 0.28780313  | 0.46488911  | -0.17976676 | 1 | 27 | C  |
| -2.02571939 | 0.50057706  | -0.04555368 | 1 | 28 | C  |
| -1.44111754 | 0.50123642  | -0.01974649 | 1 | 29 | C  |
| -0.29309212 | 0.49894306  | -0.13394519 | 1 | 30 | C  |
| 2.01983053  | 1.49322251  | 0.01064629  | 1 | 31 | C  |
| 1.44092926  | 1.49981479  | -0.00007387 | 1 | 32 | C  |
| 0.28695450  | 1.48855205  | -0.01758466 | 1 | 33 | C  |
| -2.02330802 | 1.49883437  | -0.03770463 | 1 | 34 | C  |
| -1.44123729 | 1.50282576  | -0.03682499 | 1 | 35 | C  |
| -0.29397802 | 1.49611880  | -0.07784091 | 1 | 36 | C  |
| 2.03073234  | -0.49891868 | -0.02891659 | 1 | 37 | C  |
| 1.46947986  | -0.50913938 | 0.09835547  | 1 | 38 | C  |
| 0.28782132  | -0.46492143 | -0.17977161 | 1 | 39 | C  |
| -2.02571192 | -0.50049341 | -0.04546090 | 1 | 40 | C  |
| -1.44116531 | -0.50121152 | -0.02002560 | 1 | 41 | C  |
| -0.29304074 | -0.49894383 | -0.13400297 | 1 | 42 | C  |
| 2.01979853  | -1.49315132 | 0.01130327  | 1 | 43 | C  |
| 1.44090747  | -1.49977046 | -0.00023167 | 1 | 44 | C  |
| 0.28696493  | -1.48854542 | -0.01763717 | 1 | 45 | C  |
| -2.02334775 | -1.49882711 | -0.03740179 | 1 | 46 | C  |
| -1.44117428 | -1.50279477 | -0.03630157 | 1 | 47 | C  |
| -0.29395465 | -1.49615814 | -0.07801787 | 1 | 48 | C  |
| -2.35909613 | 0.00075209  | 1.11744616  | 3 | 49 | Ru |
| -0.40563084 | -0.00009078 | 1.28778603  | 3 | 50 | Ru |
| 1.15645341  | 0.00001722  | 0.63065448  | 3 | 51 | Ru |
| -2.35028813 | 1.01282226  | 1.15821244  | 3 | 52 | Ru |
| -0.53880510 | 0.97294900  | 1.14128210  | 3 | 53 | Ru |
| 1.09238817  | 0.96016915  | 0.97590606  | 3 | 54 | Ru |
| -2.34963089 | -1.01028306 | 1.15491698  | 3 | 55 | Ru |
| -0.53898698 | -0.97269182 | 1.14051167  | 3 | 56 | Ru |
| 1.09287438  | -0.96013088 | 0.97665277  | 3 | 57 | Ru |
| -2.30159819 | -2.00001987 | 0.76442060  | 3 | 58 | Ru |
| -0.56149712 | -1.99973729 | 1.19979703  | 3 | 59 | Ru |
| 1.13200875  | -2.00009771 | 1.03118837  | 3 | 60 | Ru |
| 1.93059637  | 0.50137332  | 1.21216930  | 3 | 61 | Ru |
| 0.24050157  | 0.50058882  | 0.63916550  | 3 | 62 | Ru |
| -1.42652796 | 0.49458048  | 0.92529097  | 3 | 63 | Ru |
| 2.00875131  | 1.48321456  | 0.90356531  | 3 | 64 | Ru |
| 0.24981841  | 1.50777676  | 0.88730272  | 3 | 65 | Ru |
| -1.43529242 | 1.50009350  | 1.03493809  | 3 | 66 | Ru |
| 1.93096289  | -0.50076763 | 1.21178858  | 3 | 67 | Ru |
| 0.24063345  | -0.50066326 | 0.63910391  | 3 | 68 | Ru |
| -1.42593290 | -0.49318970 | 0.92582080  | 3 | 69 | Ru |
| 2.00906767  | -1.48428693 | 0.90609631  | 3 | 70 | Ru |
| 0.25030700  | -1.50732413 | 0.88898980  | 3 | 71 | Ru |
| -1.43478319 | -1.49936117 | 1.02897747  | 3 | 72 | Ru |
| 2.24508465  | -0.00028788 | 2.00626017  | 3 | 73 | Ru |
| 0.59957366  | -0.00015612 | 1.54536148  | 3 | 74 | Ru |
| -1.17011782 | -0.00045866 | 1.90217994  | 3 | 75 | Ru |
| 2.28403695  | 0.98851352  | 2.05663926  | 3 | 76 | Ru |
| 0.49904055  | 0.95714129  | 1.85378668  | 3 | 77 | Ru |
| -1.16819494 | 0.99327384  | 1.90611042  | 3 | 78 | Ru |
| 2.28470363  | -0.98922620 | 2.05547467  | 3 | 79 | Ru |
| 0.49948099  | -0.95687314 | 1.85494670  | 3 | 80 | Ru |
| -1.16871813 | -0.99308890 | 1.90465671  | 3 | 81 | Ru |
| 2.27866526  | -2.00024877 | 1.93658519  | 3 | 82 | Ru |
| 0.59459276  | -2.00008503 | 1.95953160  | 3 | 83 | Ru |
| -1.16515627 | -2.00022427 | 1.99682381  | 3 | 84 | Ru |
| -2.04300673 | 0.49341855  | 2.04355132  | 3 | 85 | Ru |

|             |             |            |   |     |    |
|-------------|-------------|------------|---|-----|----|
| -0.32697005 | 0.48837204  | 2.24028622 | 3 | 86  | Ru |
| 1.30630165  | 0.50058863  | 2.24774509 | 3 | 87  | Ru |
| -2.03455962 | 1.51091423  | 1.98269923 | 3 | 88  | Ru |
| -0.30196731 | 1.49805649  | 2.09524475 | 3 | 89  | Ru |
| 1.42735388  | 1.45992453  | 1.83312553 | 3 | 90  | Ru |
| -2.04332119 | -0.49513934 | 2.04876736 | 3 | 91  | Ru |
| -0.32725405 | -0.48880949 | 2.24113523 | 3 | 92  | Ru |
| 1.30728211  | -0.50074926 | 2.24761463 | 3 | 93  | Ru |
| -2.03510216 | -1.51277358 | 1.97124322 | 3 | 94  | Ru |
| -0.30220078 | -1.49792126 | 2.09419719 | 3 | 95  | Ru |
| 1.42679694  | -1.46050592 | 1.83397635 | 3 | 96  | Ru |
| -2.25478968 | 0.00010590  | 2.97735686 | 3 | 97  | Ru |
| -0.54198695 | 0.00000828  | 3.21997574 | 3 | 98  | Ru |
| 1.24211057  | -0.00014858 | 3.30438840 | 3 | 99  | Ru |
| -2.28192920 | 1.00462550  | 2.96972166 | 3 | 100 | Ru |
| -0.53917157 | 1.00486465  | 3.19706464 | 3 | 101 | Ru |
| 1.22407954  | 1.01319187  | 3.20724743 | 3 | 102 | Ru |
| -2.28182551 | -1.00486380 | 2.97047573 | 3 | 103 | Ru |
| -0.53981417 | -1.00498380 | 3.19734417 | 3 | 104 | Ru |
| 1.22455779  | -1.01303769 | 3.20719577 | 3 | 105 | Ru |
| -2.28991348 | -1.99994264 | 2.94047540 | 3 | 106 | Ru |
| -0.50481377 | -1.99988616 | 3.07672436 | 3 | 107 | Ru |
| 1.14577644  | -2.00001861 | 3.30723701 | 3 | 108 | Ru |
| 2.04711344  | 0.49787772  | 2.93163661 | 3 | 109 | Ru |
| 0.38186220  | 0.48753752  | 2.97660409 | 3 | 110 | Ru |
| -1.36330793 | 0.50209560  | 2.84819278 | 3 | 111 | Ru |
| 1.98200660  | 1.51361118  | 2.83981914 | 3 | 112 | Ru |
| 0.37633080  | 1.48107635  | 2.84941775 | 3 | 113 | Ru |
| -1.38638707 | 1.49525016  | 2.87543631 | 3 | 114 | Ru |
| 2.04711968  | -0.49808427 | 2.93150979 | 3 | 115 | Ru |
| 0.38150594  | -0.48793997 | 2.97826897 | 3 | 116 | Ru |
| -1.36278301 | -0.50221172 | 2.84884017 | 3 | 117 | Ru |
| 1.98217420  | -1.51378821 | 2.83954341 | 3 | 118 | Ru |
| 0.37634231  | -1.48120140 | 2.84918585 | 3 | 119 | Ru |
| -1.38715448 | -1.49528276 | 2.87371568 | 3 | 120 | Ru |
| 2.29542204  | -0.00017488 | 3.84402383 | 3 | 121 | Ru |
| 0.59945710  | -0.00020212 | 4.07556379 | 3 | 122 | Ru |
| -1.16646930 | 0.00003704  | 4.12805777 | 3 | 123 | Ru |
| 2.26053054  | 0.99948600  | 3.81563120 | 3 | 124 | Ru |
| 0.60216740  | 1.00846302  | 3.95322896 | 3 | 125 | Ru |
| -1.16331864 | 1.02456827  | 4.17332778 | 3 | 126 | Ru |
| 2.26065039  | -0.99945890 | 3.81568311 | 3 | 127 | Ru |
| 0.60182970  | -1.00875247 | 3.95257323 | 3 | 128 | Ru |
| -1.16331860 | -1.02452111 | 4.17390160 | 3 | 129 | Ru |
| 2.22854962  | -2.00006188 | 3.76622786 | 3 | 130 | Ru |
| 0.61330966  | -2.00011666 | 4.17941179 | 3 | 131 | Ru |
| -1.15405444 | -2.00004412 | 3.91366127 | 3 | 132 | Ru |
| -1.99301902 | 0.50603101  | 3.83764049 | 3 | 133 | Ru |
| -0.28835029 | 0.50772633  | 4.08342065 | 3 | 134 | Ru |
| 1.47565344  | 0.49562169  | 4.27442041 | 3 | 135 | Ru |
| -2.03916041 | 1.50459021  | 3.84085262 | 3 | 136 | Ru |
| -0.26495394 | 1.51226052  | 4.02370571 | 3 | 137 | Ru |
| 1.49139277  | 1.49375927  | 4.28356972 | 3 | 138 | Ru |
| -1.99277260 | -0.50612571 | 3.83716080 | 3 | 139 | Ru |
| -0.28854614 | -0.50762088 | 4.08383028 | 3 | 140 | Ru |
| 1.47533801  | -0.49559861 | 4.27456163 | 3 | 141 | Ru |
| -2.03901822 | -1.50475322 | 3.84150427 | 3 | 142 | Ru |
| -0.26509736 | -1.51212068 | 4.02415714 | 3 | 143 | Ru |
| 1.49129606  | -1.49388043 | 4.28298028 | 3 | 144 | Ru |

3)

|             |            |             |   |   |   |
|-------------|------------|-------------|---|---|---|
| -0.58875713 | 0.00001056 | -1.24525177 | 2 | 1 | O |
|-------------|------------|-------------|---|---|---|

|             |             |             |   |    |    |
|-------------|-------------|-------------|---|----|----|
| -0.60321613 | 0.00001704  | -1.69795922 | 1 | 2  | C  |
| -2.30611870 | 0.00003214  | -0.12903544 | 1 | 3  | C  |
| -1.15966452 | -0.00004476 | -0.11326620 | 1 | 4  | C  |
| -0.59249615 | 0.00004809  | -0.16703341 | 1 | 5  | C  |
| 2.31742631  | -0.00004919 | -0.12308068 | 1 | 6  | C  |
| -2.30535119 | 1.00396303  | -0.13806848 | 1 | 7  | C  |
| -1.15201597 | 1.00279955  | -0.14748941 | 1 | 8  | C  |
| -0.57858821 | 1.00110340  | -0.20231635 | 1 | 9  | C  |
| 2.31554380  | 0.99990202  | -0.13075882 | 1 | 10 | C  |
| 1.15836086  | 0.98603495  | -0.12622415 | 1 | 11 | C  |
| 0.57067396  | 0.97127829  | -0.18141233 | 1 | 12 | C  |
| -2.30542386 | -1.00397678 | -0.13807700 | 1 | 13 | C  |
| -1.15201439 | -1.00280297 | -0.14736370 | 1 | 14 | C  |
| -0.57868905 | -1.00117432 | -0.20231470 | 1 | 15 | C  |
| 2.31547301  | -0.99973377 | -0.13069734 | 1 | 16 | C  |
| 1.15832897  | -0.98585988 | -0.12642121 | 1 | 17 | C  |
| 0.57067530  | -0.97138654 | -0.18147425 | 1 | 18 | C  |
| -2.30542322 | -1.99993447 | -0.12606819 | 1 | 19 | C  |
| -1.15002878 | -2.00002043 | -0.14608637 | 1 | 20 | C  |
| -0.57284674 | -1.99991968 | -0.18990304 | 1 | 21 | C  |
| 2.31381389  | -2.00000920 | -0.09276810 | 1 | 22 | C  |
| 1.14724407  | -2.00003301 | -0.11474357 | 1 | 23 | C  |
| 0.56381230  | -1.99993134 | -0.16396922 | 1 | 24 | C  |
| 2.02709598  | 0.49508192  | -0.11318094 | 1 | 25 | C  |
| 1.46249178  | 0.51061467  | -0.03435897 | 1 | 26 | C  |
| 0.28198134  | 0.45469652  | -0.20586816 | 1 | 27 | C  |
| -2.02230751 | 0.50051280  | -0.11884861 | 1 | 28 | C  |
| -1.44399941 | 0.50368201  | -0.09673900 | 1 | 29 | C  |
| -0.29405019 | 0.49291420  | -0.19478547 | 1 | 30 | C  |
| 2.01882484  | 1.49718035  | -0.11800773 | 1 | 31 | C  |
| 1.43681824  | 1.49354663  | -0.11514391 | 1 | 32 | C  |
| 0.28551846  | 1.48880992  | -0.20939664 | 1 | 33 | C  |
| -2.02106999 | 1.50149495  | -0.13364676 | 1 | 34 | C  |
| -1.44085187 | 1.50293321  | -0.12597009 | 1 | 35 | C  |
| -0.28768417 | 1.49819708  | -0.21588391 | 1 | 36 | C  |
| 2.02705459  | -0.49503742 | -0.11320726 | 1 | 37 | C  |
| 1.46265439  | -0.51066404 | -0.03446748 | 1 | 38 | C  |
| 0.28202128  | -0.45464208 | -0.20594300 | 1 | 39 | C  |
| -2.02225402 | -0.50047446 | -0.11864851 | 1 | 40 | C  |
| -1.44405842 | -0.50357995 | -0.09657036 | 1 | 41 | C  |
| -0.29414393 | -0.49288648 | -0.19477073 | 1 | 42 | C  |
| 2.01889655  | -1.49713425 | -0.11800843 | 1 | 43 | C  |
| 1.43670489  | -1.49352531 | -0.11519681 | 1 | 44 | C  |
| 0.28554572  | -1.48871993 | -0.20939502 | 1 | 45 | C  |
| -2.02112758 | -1.50154516 | -0.13374615 | 1 | 46 | C  |
| -1.44070969 | -1.50287054 | -0.12601841 | 1 | 47 | C  |
| -0.28763559 | -1.49818882 | -0.21595777 | 1 | 48 | C  |
| -2.26501462 | 0.00002875  | 1.13157715  | 3 | 49 | Ru |
| -0.41804219 | -0.00045707 | 1.24162690  | 3 | 50 | Ru |
| 1.14959236  | -0.00008958 | 0.51795911  | 3 | 51 | Ru |
| -2.33152261 | 0.99233868  | 1.10438597  | 3 | 52 | Ru |
| -0.53495435 | 0.99564446  | 1.10607952  | 3 | 53 | Ru |
| 1.07826668  | 0.87591354  | 1.05448224  | 3 | 54 | Ru |
| -2.33145280 | -0.99232962 | 1.10432541  | 3 | 55 | Ru |
| -0.53534647 | -0.99574251 | 1.10527393  | 3 | 56 | Ru |
| 1.07797993  | -0.87551096 | 1.05499987  | 3 | 57 | Ru |
| -2.38692902 | -2.00014281 | 1.09095513  | 3 | 58 | Ru |
| -0.56046385 | -1.99981182 | 1.11863306  | 3 | 59 | Ru |
| 1.08724344  | -2.00001504 | 0.77064736  | 3 | 60 | Ru |
| 1.97880878  | 0.49306911  | 1.09369916  | 3 | 61 | Ru |
| 0.24371148  | 0.52066924  | 0.61858593  | 3 | 62 | Ru |
| -1.40662153 | 0.50302375  | 0.84536314  | 3 | 63 | Ru |

|             |             |            |   |     |    |
|-------------|-------------|------------|---|-----|----|
| 2.00436662  | 1.47534408  | 0.77687080 | 3 | 64  | Ru |
| 0.32566148  | 1.49923202  | 1.21220070 | 3 | 65  | Ru |
| -1.44442253 | 1.50403657  | 0.95599020 | 3 | 66  | Ru |
| 1.97866073  | -0.49310498 | 1.09390948 | 3 | 67  | Ru |
| 0.24364355  | -0.52070308 | 0.61851367 | 3 | 68  | Ru |
| -1.40715931 | -0.50257300 | 0.84319338 | 3 | 69  | Ru |
| 2.00441444  | -1.47519180 | 0.77687938 | 3 | 70  | Ru |
| 0.32576968  | -1.49908040 | 1.21227948 | 3 | 71  | Ru |
| -1.44448748 | -1.50391188 | 0.95614420 | 3 | 72  | Ru |
| 2.26360520  | 0.00005350  | 1.92456660 | 3 | 73  | Ru |
| 0.55424194  | 0.00021047  | 1.53389700 | 3 | 74  | Ru |
| -1.17123030 | -0.00004953 | 1.85214753 | 3 | 75  | Ru |
| 2.26755992  | 0.98750500  | 1.98563562 | 3 | 76  | Ru |
| 0.53809024  | 0.94599901  | 2.04548760 | 3 | 77  | Ru |
| -1.17447450 | 0.99006556  | 1.86402530 | 3 | 78  | Ru |
| 2.26772630  | -0.98737278 | 1.98575158 | 3 | 79  | Ru |
| 0.53768441  | -0.94535033 | 2.04578656 | 3 | 80  | Ru |
| -1.17468477 | -0.99014250 | 1.86377039 | 3 | 81  | Ru |
| 2.26013032  | -1.99992024 | 1.97328871 | 3 | 82  | Ru |
| 0.65015368  | -1.99978500 | 2.15421720 | 3 | 83  | Ru |
| -1.16843949 | -1.99992842 | 1.90591423 | 3 | 84  | Ru |
| -2.04464573 | 0.49730317  | 2.04380980 | 3 | 85  | Ru |
| -0.35624361 | 0.49335081  | 2.26235206 | 3 | 86  | Ru |
| 1.36491529  | 0.48831349  | 2.17329289 | 3 | 87  | Ru |
| -2.03718873 | 1.50075751  | 1.98134697 | 3 | 88  | Ru |
| -0.30611429 | 1.50395101  | 2.08958019 | 3 | 89  | Ru |
| 1.42420206  | 1.49582001  | 1.74815211 | 3 | 90  | Ru |
| -2.04466902 | -0.49714091 | 2.04382282 | 3 | 91  | Ru |
| -0.35757328 | -0.49335129 | 2.26535564 | 3 | 92  | Ru |
| 1.36481591  | -0.48836941 | 2.17355602 | 3 | 93  | Ru |
| -2.03720498 | -1.50068483 | 1.98110935 | 3 | 94  | Ru |
| -0.30593239 | -1.50339599 | 2.08817088 | 3 | 95  | Ru |
| 1.42433581  | -1.49553894 | 1.74832982 | 3 | 96  | Ru |
| -2.23278240 | 0.00002386  | 2.97322371 | 3 | 97  | Ru |
| -0.59024832 | -0.00001280 | 3.33439461 | 3 | 98  | Ru |
| 1.26807911  | 0.00027025  | 3.40307676 | 3 | 99  | Ru |
| -2.27670369 | 1.00627906  | 2.94112493 | 3 | 100 | Ru |
| -0.56665649 | 0.99899032  | 3.29405413 | 3 | 101 | Ru |
| 1.19917674  | 0.98834338  | 3.12898769 | 3 | 102 | Ru |
| -2.27671466 | -1.00621527 | 2.94165293 | 3 | 103 | Ru |
| -0.56691767 | -0.99911375 | 3.29477591 | 3 | 104 | Ru |
| 1.19901968  | -0.98815096 | 3.12939309 | 3 | 105 | Ru |
| -2.27031160 | -1.99993987 | 2.90760916 | 3 | 106 | Ru |
| -0.52797809 | -1.99989544 | 3.22464037 | 3 | 107 | Ru |
| 1.17442218  | -1.99999492 | 3.31339907 | 3 | 108 | Ru |
| 2.05177670  | 0.49024178  | 2.90060883 | 3 | 109 | Ru |
| 0.33489170  | 0.47116228  | 3.02691446 | 3 | 110 | Ru |
| -1.32885014 | 0.50066103  | 2.82709840 | 3 | 111 | Ru |
| 1.97697118  | 1.50786034  | 2.82302001 | 3 | 112 | Ru |
| 0.31595878  | 1.48183252  | 2.95360621 | 3 | 113 | Ru |
| -1.34434657 | 1.49950937  | 2.83927658 | 3 | 114 | Ru |
| 2.05176394  | -0.49039644 | 2.90084626 | 3 | 115 | Ru |
| 0.33503789  | -0.47103706 | 3.02842538 | 3 | 116 | Ru |
| -1.32901429 | -0.50078280 | 2.82756999 | 3 | 117 | Ru |
| 1.97697864  | -1.50775461 | 2.82318021 | 3 | 118 | Ru |
| 0.31594379  | -1.48159638 | 2.95361088 | 3 | 119 | Ru |
| -1.34432075 | -1.49943069 | 2.83907499 | 3 | 120 | Ru |
| 2.30282788  | -0.00009353 | 3.84281769 | 3 | 121 | Ru |
| 0.60103512  | -0.00021959 | 4.24137507 | 3 | 122 | Ru |
| -1.20031833 | 0.00007531  | 4.24366860 | 3 | 123 | Ru |
| 2.26172287  | 0.99524361  | 3.79416613 | 3 | 124 | Ru |
| 0.60255265  | 0.98038997  | 3.94408462 | 3 | 125 | Ru |

|             |             |            |   |     |    |
|-------------|-------------|------------|---|-----|----|
| -1.18587550 | 1.02211551  | 4.22944553 | 3 | 126 | Ru |
| 2.26178481  | -0.99529005 | 3.79425675 | 3 | 127 | Ru |
| 0.60236427  | -0.98083140 | 3.94477216 | 3 | 128 | Ru |
| -1.18625473 | -1.02220017 | 4.22997646 | 3 | 129 | Ru |
| 2.24783513  | -2.00002683 | 3.75577569 | 3 | 130 | Ru |
| 0.60673509  | -2.00006217 | 4.16668516 | 3 | 131 | Ru |
| -1.17016618 | -2.00003070 | 4.03759580 | 3 | 132 | Ru |
| -1.96270244 | 0.50665280  | 3.82004433 | 3 | 133 | Ru |
| -0.29609825 | 0.50300474  | 4.20320259 | 3 | 134 | Ru |
| 1.50051253  | 0.50281066  | 4.30863618 | 3 | 135 | Ru |
| -2.02652218 | 1.50341016  | 3.80580254 | 3 | 136 | Ru |
| -0.26980393 | 1.50239036  | 4.15822005 | 3 | 137 | Ru |
| 1.48637689  | 1.49800387  | 4.23612620 | 3 | 138 | Ru |
| -1.96197377 | -0.50672617 | 3.81991789 | 3 | 139 | Ru |
| -0.29615656 | -0.50291629 | 4.20329694 | 3 | 140 | Ru |
| 1.50034354  | -0.50281780 | 4.30839095 | 3 | 141 | Ru |
| -2.02670693 | -1.50344852 | 3.80617316 | 3 | 142 | Ru |
| -0.26998712 | -1.50265209 | 4.15885689 | 3 | 143 | Ru |
| 1.48643705  | -1.49809778 | 4.23619923 | 3 | 144 | Ru |

4)

|             |             |             |   |    |   |
|-------------|-------------|-------------|---|----|---|
| -0.59468289 | 0.00054286  | -1.34696808 | 2 | 1  | O |
| -0.61418648 | 0.00069047  | -1.81429067 | 1 | 2  | C |
| -2.29426337 | 0.00021501  | -0.26010760 | 1 | 3  | C |
| -1.13708619 | 0.00025974  | -0.19541487 | 1 | 4  | C |
| -0.56870954 | -0.00001643 | -0.26197006 | 1 | 5  | C |
| 2.33645941  | 0.00018222  | -0.27518983 | 1 | 6  | C |
| -2.29143859 | 0.99907950  | -0.26697635 | 1 | 7  | C |
| -1.13634162 | 1.00271508  | -0.26640206 | 1 | 8  | C |
| -0.56262300 | 1.00135809  | -0.30450383 | 1 | 9  | C |
| 2.33356535  | 0.99750020  | -0.27455417 | 1 | 10 | C |
| 1.17393550  | 0.99254745  | -0.27018663 | 1 | 11 | C |
| 0.59212351  | 0.98162014  | -0.30848140 | 1 | 12 | C |
| -2.29141278 | -0.99883440 | -0.26693989 | 1 | 13 | C |
| -1.13643370 | -1.00276897 | -0.26612358 | 1 | 14 | C |
| -0.56227128 | -1.00103317 | -0.30408713 | 1 | 15 | C |
| 2.33334484  | -0.99755936 | -0.27446098 | 1 | 16 | C |
| 1.17394576  | -0.99232213 | -0.26933613 | 1 | 17 | C |
| 0.59190804  | -0.98162075 | -0.30801150 | 1 | 18 | C |
| -2.29107517 | -2.00001376 | -0.24390480 | 1 | 19 | C |
| -1.13401644 | -1.99988637 | -0.30826560 | 1 | 20 | C |
| -0.55939009 | -2.00024277 | -0.34040687 | 1 | 21 | C |
| 2.33009703  | -1.99988672 | -0.21139429 | 1 | 22 | C |
| 1.15949692  | -2.00009434 | -0.20886734 | 1 | 23 | C |
| 0.58577988  | -2.00031321 | -0.28588223 | 1 | 24 | C |
| 2.04620211  | 0.50130981  | -0.27190533 | 1 | 25 | C |
| 1.47977838  | 0.51359556  | -0.18301338 | 1 | 26 | C |
| 0.30500028  | 0.46818760  | -0.32048821 | 1 | 27 | C |
| -2.00788088 | 0.50233514  | -0.23535490 | 1 | 28 | C |
| -1.42811583 | 0.50582197  | -0.19710717 | 1 | 29 | C |
| -0.27411788 | 0.49411079  | -0.29712031 | 1 | 30 | C |
| 2.04074673  | 1.49749888  | -0.22433550 | 1 | 31 | C |
| 1.45838409  | 1.49661674  | -0.22918211 | 1 | 32 | C |
| 0.30613302  | 1.49246475  | -0.33480316 | 1 | 33 | C |
| -2.00308385 | 1.50059911  | -0.26794655 | 1 | 34 | C |
| -1.42629276 | 1.50347588  | -0.28130686 | 1 | 35 | C |
| -0.27020007 | 1.50060281  | -0.34642109 | 1 | 36 | C |
| 2.04626926  | -0.50132758 | -0.27159743 | 1 | 37 | C |
| 1.47964595  | -0.51325119 | -0.18213823 | 1 | 38 | C |
| 0.30509049  | -0.46792505 | -0.32038181 | 1 | 39 | C |
| -2.00751640 | -0.50242368 | -0.23524936 | 1 | 40 | C |
| -1.42858561 | -0.50596919 | -0.19714460 | 1 | 41 | C |

|             |             |             |   |     |    |
|-------------|-------------|-------------|---|-----|----|
| -0.27421058 | -0.49434558 | -0.29715960 | 1 | 42  | C  |
| 2.04062924  | -1.49733563 | -0.22425736 | 1 | 43  | C  |
| 1.45872630  | -1.49605003 | -0.22887812 | 1 | 44  | C  |
| 0.30602668  | -1.49176153 | -0.33457105 | 1 | 45  | C  |
| -2.00314037 | -1.50048881 | -0.26801117 | 1 | 46  | C  |
| -1.42614231 | -1.50340308 | -0.28119241 | 1 | 47  | C  |
| -0.27014545 | -1.50047198 | -0.34617896 | 1 | 48  | C  |
| -2.19855507 | -0.00062624 | 1.14539520  | 3 | 49  | Ru |
| -0.47155154 | -0.00074638 | 1.21412323  | 3 | 50  | Ru |
| 1.20517367  | 0.00066120  | 0.37348350  | 3 | 51  | Ru |
| -2.39733944 | 0.96847507  | 0.95643355  | 3 | 52  | Ru |
| -0.47596819 | 1.04039874  | 0.80090934  | 3 | 53  | Ru |
| 0.99205014  | 0.90755031  | 0.95297347  | 3 | 54  | Ru |
| -2.39632257 | -0.96889761 | 0.95427799  | 3 | 55  | Ru |
| -0.47580525 | -1.04091873 | 0.79921272  | 3 | 56  | Ru |
| 0.99321260  | -0.90848350 | 0.95218815  | 3 | 57  | Ru |
| -2.33781639 | -2.00035413 | 0.83545637  | 3 | 58  | Ru |
| -0.39497406 | -2.00047358 | 0.98995988  | 3 | 59  | Ru |
| 0.92334452  | -2.00085100 | 0.79496190  | 3 | 60  | Ru |
| 1.90905116  | 0.48666720  | 1.08221178  | 3 | 61  | Ru |
| 0.25313425  | 0.48889497  | 0.50060113  | 3 | 62  | Ru |
| -1.39614322 | 0.50272111  | 0.72941961  | 3 | 63  | Ru |
| 1.89819848  | 1.47800220  | 0.68327744  | 3 | 64  | Ru |
| 0.27961397  | 1.43411440  | 1.49271957  | 3 | 65  | Ru |
| -1.41447493 | 1.49962124  | 0.87658637  | 3 | 66  | Ru |
| 1.90972854  | -0.48690793 | 1.08192107  | 3 | 67  | Ru |
| 0.25339430  | -0.48878486 | 0.50009215  | 3 | 68  | Ru |
| -1.39587305 | -0.50326362 | 0.72876251  | 3 | 69  | Ru |
| 1.89908762  | -1.47883248 | 0.68426090  | 3 | 70  | Ru |
| 0.27993356  | -1.43441375 | 1.49128824  | 3 | 71  | Ru |
| -1.41385391 | -1.50047471 | 0.87613420  | 3 | 72  | Ru |
| 2.30582690  | -0.00030360 | 1.97938969  | 3 | 73  | Ru |
| 0.45563648  | -0.00002362 | 1.59537508  | 3 | 74  | Ru |
| -1.09370505 | -0.00004019 | 1.98353978  | 3 | 75  | Ru |
| 2.29432715  | 1.02360395  | 1.91455001  | 3 | 76  | Ru |
| 0.58745218  | 0.89949812  | 2.45402668  | 3 | 77  | Ru |
| -0.98087706 | 0.96219812  | 1.70623779  | 3 | 78  | Ru |
| 2.29451946  | -1.02477755 | 1.91359115  | 3 | 79  | Ru |
| 0.58712671  | -0.89985697 | 2.45347236  | 3 | 80  | Ru |
| -0.98041066 | -0.96269352 | 1.70485800  | 3 | 81  | Ru |
| 2.23260548  | -2.00037599 | 1.64909197  | 3 | 82  | Ru |
| 0.68936876  | -2.00001848 | 2.41502729  | 3 | 83  | Ru |
| -1.03663086 | -2.00010139 | 1.78705959  | 3 | 84  | Ru |
| -1.96633052 | 0.52149038  | 2.04104143  | 3 | 85  | Ru |
| -0.37276455 | 0.49372265  | 2.53597551  | 3 | 86  | Ru |
| 1.33829090  | 0.48556788  | 1.98117704  | 3 | 87  | Ru |
| -1.96460148 | 1.48876399  | 1.73665732  | 3 | 88  | Ru |
| -0.29686020 | 1.49657802  | 2.36404225  | 3 | 89  | Ru |
| 1.33512552  | 1.49698311  | 1.69876310  | 3 | 90  | Ru |
| -1.96567806 | -0.52278729 | 2.04131980  | 3 | 91  | Ru |
| -0.37320951 | -0.49465688 | 2.53592153  | 3 | 92  | Ru |
| 1.33802352  | -0.48618205 | 1.98027246  | 3 | 93  | Ru |
| -1.96487352 | -1.48895890 | 1.73551010  | 3 | 94  | Ru |
| -0.29647536 | -1.49690636 | 2.36211731  | 3 | 95  | Ru |
| 1.33537655  | -1.49755383 | 1.69823054  | 3 | 96  | Ru |
| -2.33720418 | -0.00029888 | 2.89415127  | 3 | 97  | Ru |
| -0.69632049 | 0.00016712  | 3.48949092  | 3 | 98  | Ru |
| 1.31214581  | -0.00019818 | 3.65484663  | 3 | 99  | Ru |
| -2.37584562 | 1.03902477  | 2.87657055  | 3 | 100 | Ru |
| -0.68067253 | 1.01031327  | 3.45215967  | 3 | 101 | Ru |
| 1.19652279  | 0.98001495  | 3.33752725  | 3 | 102 | Ru |
| -2.37610240 | -1.03980372 | 2.87691968  | 3 | 103 | Ru |

|             |             |            |   |     |    |
|-------------|-------------|------------|---|-----|----|
| -0.68056938 | -1.01026741 | 3.45329058 | 3 | 104 | Ru |
| 1.19569811  | -0.97959207 | 3.33681547 | 3 | 105 | Ru |
| -2.34927269 | -1.99970424 | 2.59920673 | 3 | 106 | Ru |
| -0.69290409 | -2.00003558 | 3.33004874 | 3 | 107 | Ru |
| 1.18763669  | -1.99980757 | 3.48911048 | 3 | 108 | Ru |
| 1.92776014  | 0.49376631  | 2.87670261 | 3 | 109 | Ru |
| 0.29239273  | 0.47009884  | 3.40114180 | 3 | 110 | Ru |
| -1.41294063 | 0.50576543  | 2.93847523 | 3 | 111 | Ru |
| 1.80188168  | 1.49987806  | 2.67820403 | 3 | 112 | Ru |
| 0.26046010  | 1.49425298  | 3.27367040 | 3 | 113 | Ru |
| -1.35857061 | 1.47747366  | 2.68514913 | 3 | 114 | Ru |
| 1.92731124  | -0.49409638 | 2.87570574 | 3 | 115 | Ru |
| 0.29134322  | -0.47149800 | 3.40085592 | 3 | 116 | Ru |
| -1.41262266 | -0.50586114 | 2.93892882 | 3 | 117 | Ru |
| 1.80155551  | -1.50025643 | 2.67822892 | 3 | 118 | Ru |
| 0.25955011  | -1.49517393 | 3.27215112 | 3 | 119 | Ru |
| -1.35741814 | -1.47697410 | 2.68517966 | 3 | 120 | Ru |
| 2.33230174  | -0.00015824 | 3.93802272 | 3 | 121 | Ru |
| 0.64489420  | -0.00015814 | 4.58684750 | 3 | 122 | Ru |
| -1.25673496 | -0.00004405 | 4.36201472 | 3 | 123 | Ru |
| 2.31564953  | 1.00084572  | 3.79751942 | 3 | 124 | Ru |
| 0.70436901  | 0.96945887  | 4.25466397 | 3 | 125 | Ru |
| -1.20803656 | 1.01768756  | 4.37558946 | 3 | 126 | Ru |
| 2.31584712  | -1.00065922 | 3.79765548 | 3 | 127 | Ru |
| 0.70448431  | -0.96928851 | 4.25430564 | 3 | 128 | Ru |
| -1.20783745 | -1.01753127 | 4.37661258 | 3 | 129 | Ru |
| 2.24258471  | -2.00013672 | 3.54667485 | 3 | 130 | Ru |
| 0.64503825  | -1.99981713 | 4.36807525 | 3 | 131 | Ru |
| -1.21515804 | -1.99984022 | 4.22516261 | 3 | 132 | Ru |
| -1.95514097 | 0.51033089  | 3.83086595 | 3 | 133 | Ru |
| -0.28160545 | 0.49943281  | 4.34896593 | 3 | 134 | Ru |
| 1.62207600  | 0.50820314  | 4.52858692 | 3 | 135 | Ru |
| -1.95245020 | 1.51809999  | 3.67322375 | 3 | 136 | Ru |
| -0.24980686 | 1.50312258  | 4.24796228 | 3 | 137 | Ru |
| 1.62608759  | 1.50725222  | 4.31502511 | 3 | 138 | Ru |
| -1.95511139 | -0.51043805 | 3.83071852 | 3 | 139 | Ru |
| -0.28173361 | -0.49933181 | 4.34931548 | 3 | 140 | Ru |
| 1.62228754  | -0.50816841 | 4.52843852 | 3 | 141 | Ru |
| -1.95218378 | -1.51814578 | 3.67330764 | 3 | 142 | Ru |
| -0.24948187 | -1.50346492 | 4.24852463 | 3 | 143 | Ru |
| 1.62609319  | -1.50738263 | 4.31487763 | 3 | 144 | Ru |

5)

|             |             |             |   |    |   |
|-------------|-------------|-------------|---|----|---|
| -0.58460680 | 0.00002214  | -1.35282377 | 2 | 1  | O |
| -0.61550707 | 0.00017990  | -1.82492061 | 1 | 2  | C |
| -2.30968855 | -0.00000904 | -0.28809021 | 1 | 3  | C |
| -1.15335869 | 0.00006915  | -0.24151905 | 1 | 4  | C |
| -0.58053216 | 0.00009063  | -0.27061648 | 1 | 5  | C |
| 2.32115581  | -0.00002857 | -0.29069381 | 1 | 6  | C |
| -2.30396988 | 1.00576239  | -0.29842210 | 1 | 7  | C |
| -1.15010016 | 1.00710829  | -0.29132789 | 1 | 8  | C |
| -0.57757805 | 1.00043028  | -0.32720318 | 1 | 9  | C |
| 2.32185058  | 0.99920382  | -0.28735939 | 1 | 10 | C |
| 1.16013015  | 1.00003648  | -0.29438133 | 1 | 11 | C |
| 0.58081340  | 0.98870831  | -0.30582643 | 1 | 12 | C |
| -2.30395699 | -1.00566754 | -0.29802820 | 1 | 13 | C |
| -1.15027299 | -1.00708312 | -0.29072409 | 1 | 14 | C |
| -0.57746958 | -1.00025625 | -0.32696432 | 1 | 15 | C |
| 2.32181433  | -0.99931390 | -0.28715354 | 1 | 16 | C |
| 1.16017566  | -0.99991816 | -0.29437400 | 1 | 17 | C |
| 0.58094733  | -0.98877294 | -0.30606928 | 1 | 18 | C |
| -2.30754449 | -1.99993609 | -0.29644731 | 1 | 19 | C |

|             |             |             |   |    |    |
|-------------|-------------|-------------|---|----|----|
| -1.15177226 | -1.99997023 | -0.32004676 | 1 | 20 | C  |
| -0.57460664 | -2.00022330 | -0.33540407 | 1 | 21 | C  |
| 2.32600682  | -1.99989949 | -0.23570616 | 1 | 22 | C  |
| 1.14797801  | -1.99998394 | -0.25845991 | 1 | 23 | C  |
| 0.57060315  | -2.00026403 | -0.31354689 | 1 | 24 | C  |
| 2.03484643  | 0.50398750  | -0.28448429 | 1 | 25 | C  |
| 1.46672072  | 0.52430634  | -0.22133189 | 1 | 26 | C  |
| 0.28983098  | 0.48345241  | -0.27797579 | 1 | 27 | C  |
| -2.02256487 | 0.50005949  | -0.27685254 | 1 | 28 | C  |
| -1.44590575 | 0.50236559  | -0.25264537 | 1 | 29 | C  |
| -0.28527069 | 0.49583632  | -0.29799026 | 1 | 30 | C  |
| 2.02326789  | 1.49542380  | -0.23767860 | 1 | 31 | C  |
| 1.44506853  | 1.49849076  | -0.26584037 | 1 | 32 | C  |
| 0.28836691  | 1.49749810  | -0.34015395 | 1 | 33 | C  |
| -2.01580049 | 1.50016726  | -0.31188705 | 1 | 34 | C  |
| -1.44032302 | 1.50294134  | -0.31245317 | 1 | 35 | C  |
| -0.28618583 | 1.50013444  | -0.34820088 | 1 | 36 | C  |
| 2.03464873  | -0.50400507 | -0.28423562 | 1 | 37 | C  |
| 1.46663642  | -0.52434229 | -0.22102251 | 1 | 38 | C  |
| 0.28983228  | -0.48353330 | -0.27810987 | 1 | 39 | C  |
| -2.02257007 | -0.50018025 | -0.27658508 | 1 | 40 | C  |
| -1.44589632 | -0.50266358 | -0.25221895 | 1 | 41 | C  |
| -0.28526518 | -0.49631621 | -0.29801252 | 1 | 42 | C  |
| 2.02330580  | -1.49574557 | -0.23781367 | 1 | 43 | C  |
| 1.44508021  | -1.49859304 | -0.26599114 | 1 | 44 | C  |
| 0.28787351  | -1.49739881 | -0.34036433 | 1 | 45 | C  |
| -2.01576328 | -1.50040752 | -0.31157905 | 1 | 46 | C  |
| -1.44036864 | -1.50307639 | -0.31197073 | 1 | 47 | C  |
| -0.28567037 | -1.50022734 | -0.34827227 | 1 | 48 | C  |
| -2.07763033 | 0.00023292  | 1.11169503  | 3 | 49 | Ru |
| -0.39733342 | -0.00102395 | 1.20412255  | 3 | 50 | Ru |
| 1.13907354  | 0.00049458  | 0.26622626  | 3 | 51 | Ru |
| -2.31688192 | 0.96873623  | 0.97983621  | 3 | 52 | Ru |
| -0.52085129 | 0.99973942  | 1.04083559  | 3 | 53 | Ru |
| 1.05611384  | 0.67509464  | 1.11215294  | 3 | 54 | Ru |
| -2.31643820 | -0.96866319 | 0.97980155  | 3 | 55 | Ru |
| -0.52056274 | -1.00144562 | 1.03786186  | 3 | 56 | Ru |
| 1.05702888  | -0.67606920 | 1.11087766  | 3 | 57 | Ru |
| -2.38554973 | -2.00017653 | 1.00647586  | 3 | 58 | Ru |
| -0.48258843 | -2.00056279 | 1.03733773  | 3 | 59 | Ru |
| 1.11252667  | -2.00036043 | 0.65536755  | 3 | 60 | Ru |
| 1.98948613  | 0.48892928  | 0.94735245  | 3 | 61 | Ru |
| 0.24657805  | 0.51776165  | 0.53719266  | 3 | 62 | Ru |
| -1.35578054 | 0.53801411  | 0.63010274  | 3 | 63 | Ru |
| 2.00951982  | 1.46924088  | 0.66357502  | 3 | 64 | Ru |
| 0.42160052  | 1.45226104  | 1.15517630  | 3 | 65 | Ru |
| -1.43654591 | 1.49364362  | 1.00601643  | 3 | 66 | Ru |
| 1.98998555  | -0.48860409 | 0.94702258  | 3 | 67 | Ru |
| 0.24733344  | -0.51781088 | 0.53698970  | 3 | 68 | Ru |
| -1.35561228 | -0.53785695 | 0.63072069  | 3 | 69 | Ru |
| 2.01013363  | -1.46890693 | 0.66311115  | 3 | 70 | Ru |
| 0.42186329  | -1.45260732 | 1.15512564  | 3 | 71 | Ru |
| -1.43714631 | -1.49518668 | 1.00441727  | 3 | 72 | Ru |
| 2.27612329  | 0.00000745  | 1.79136441  | 3 | 73 | Ru |
| 0.47266956  | -0.00040483 | 1.62638687  | 3 | 74 | Ru |
| -1.19668587 | 0.00087980  | 1.74671452  | 3 | 75 | Ru |
| 2.25960679  | 0.98532767  | 1.90509987  | 3 | 76 | Ru |
| 0.54589717  | 0.93184826  | 2.24764113  | 3 | 77 | Ru |
| -1.13760218 | 0.99087979  | 1.87616097  | 3 | 78 | Ru |
| 2.25970196  | -0.98547104 | 1.90472511  | 3 | 79 | Ru |
| 0.54496258  | -0.93040013 | 2.24813633  | 3 | 80 | Ru |
| -1.13834123 | -0.98961804 | 1.87225701  | 3 | 81 | Ru |



|             |             |            |   |     |    |
|-------------|-------------|------------|---|-----|----|
| 2.21147687  | -2.00006432 | 1.85027627 | 3 | 82  | Ru |
| 0.66866381  | -1.99921214 | 2.23489122 | 3 | 83  | Ru |
| -1.11109325 | -1.99974218 | 1.89244801 | 3 | 84  | Ru |
| -2.05357088 | 0.50090624  | 2.03022802 | 3 | 85  | Ru |
| -0.37064519 | 0.49362896  | 2.33157335 | 3 | 86  | Ru |
| 1.37010265  | 0.47410898  | 2.11919276 | 3 | 87  | Ru |
| -2.03478719 | 1.49655179  | 1.86747417 | 3 | 88  | Ru |
| -0.22311722 | 1.49058505  | 1.94139841 | 3 | 89  | Ru |
| 1.36554563  | 1.47820007  | 1.65966462 | 3 | 90  | Ru |
| -2.05347230 | -0.50081667 | 2.02987809 | 3 | 91  | Ru |
| -0.37225998 | -0.49352723 | 2.33212602 | 3 | 92  | Ru |
| 1.37004604  | -0.47448054 | 2.11758762 | 3 | 93  | Ru |
| -2.03447631 | -1.49660592 | 1.86720612 | 3 | 94  | Ru |
| -0.22364868 | -1.48899063 | 1.94057431 | 3 | 95  | Ru |
| 1.36582376  | -1.47846125 | 1.65926629 | 3 | 96  | Ru |
| -2.25904523 | 0.00016243  | 2.94046892 | 3 | 97  | Ru |
| -0.68187390 | 0.00010241  | 3.39578901 | 3 | 98  | Ru |
| 1.23721055  | -0.00010261 | 3.53230244 | 3 | 99  | Ru |
| -2.32337193 | 1.02149288  | 2.90073597 | 3 | 100 | Ru |
| -0.66508723 | 1.00034275  | 3.38198081 | 3 | 101 | Ru |
| 1.16173692  | 0.95968408  | 3.14095048 | 3 | 102 | Ru |
| -2.32322430 | -1.02112270 | 2.90054433 | 3 | 103 | Ru |
| -0.66596725 | -1.00044115 | 3.38217204 | 3 | 104 | Ru |
| 1.16197205  | -0.95878167 | 3.13984692 | 3 | 105 | Ru |
| -2.31916459 | -1.99982256 | 2.76102036 | 3 | 106 | Ru |
| -0.64969059 | -1.99993452 | 3.29466424 | 3 | 107 | Ru |
| 1.15071678  | -1.99965708 | 3.28968490 | 3 | 108 | Ru |
| 2.02238900  | 0.48901091  | 2.88562212 | 3 | 109 | Ru |
| 0.26651741  | 0.46639438  | 3.16585034 | 3 | 110 | Ru |
| -1.36018240 | 0.50039967  | 2.80923412 | 3 | 111 | Ru |
| 1.89797565  | 1.50478752  | 2.70854360 | 3 | 112 | Ru |
| 0.21992147  | 1.49481638  | 3.05512275 | 3 | 113 | Ru |
| -1.37089167 | 1.49741441  | 2.78624150 | 3 | 114 | Ru |
| 2.02265051  | -0.48768717 | 2.88359350 | 3 | 115 | Ru |
| 0.26523869  | -0.46724759 | 3.16721878 | 3 | 116 | Ru |
| -1.36036491 | -0.50026885 | 2.80893877 | 3 | 117 | Ru |
| 1.89824192  | -1.50437008 | 2.70878312 | 3 | 118 | Ru |
| 0.22016356  | -1.49473680 | 3.05588434 | 3 | 119 | Ru |
| -1.37062182 | -1.49678994 | 2.78480418 | 3 | 120 | Ru |
| 2.34275979  | -0.00001996 | 3.82485857 | 3 | 121 | Ru |
| 0.61335501  | -0.00010994 | 4.51508213 | 3 | 122 | Ru |
| -1.20809403 | -0.00015645 | 4.30577396 | 3 | 123 | Ru |
| 2.28749283  | 0.99818716  | 3.79028432 | 3 | 124 | Ru |
| 0.66799429  | 0.91789257  | 4.04414047 | 3 | 125 | Ru |
| -1.18944727 | 1.02196436  | 4.33345011 | 3 | 126 | Ru |
| 2.28521596  | -0.99812180 | 3.78801278 | 3 | 127 | Ru |
| 0.66860148  | -0.91871096 | 4.04410793 | 3 | 128 | Ru |
| -1.18922338 | -1.02205179 | 4.33384649 | 3 | 129 | Ru |
| 2.24363758  | -2.00027109 | 3.61908448 | 3 | 130 | Ru |
| 0.62332558  | -2.00051529 | 4.16237445 | 3 | 131 | Ru |
| -1.18316860 | -1.99982881 | 4.17294600 | 3 | 132 | Ru |
| -1.90696832 | 0.51382191  | 3.77394636 | 3 | 133 | Ru |
| -0.27815485 | 0.49947367  | 4.26061590 | 3 | 134 | Ru |
| 1.57533932  | 0.50576806  | 4.40396551 | 3 | 135 | Ru |
| -1.98238694 | 1.51025982  | 3.74538504 | 3 | 136 | Ru |
| -0.24448201 | 1.49653103  | 4.20402587 | 3 | 137 | Ru |
| 1.52043205  | 1.49787635  | 4.20574220 | 3 | 138 | Ru |
| -1.90653356 | -0.51407552 | 3.77332043 | 3 | 139 | Ru |
| -0.27769382 | -0.49980158 | 4.26054988 | 3 | 140 | Ru |
| 1.57528500  | -0.50610045 | 4.40417277 | 3 | 141 | Ru |
| -1.98351537 | -1.50982430 | 3.74578614 | 3 | 142 | Ru |
| -0.24383679 | -1.49651075 | 4.20376613 | 3 | 143 | Ru |

1.52078605 -1.49867090 4.20647505 3 144 Ru

Penetration throughout 2vacancy

|             |             |             |   |    |    |
|-------------|-------------|-------------|---|----|----|
| 0.86139469  | -0.00000385 | 0.23152296  | 2 | 1  | O  |
| 0.86091976  | -0.00000129 | -0.23152296 | 1 | 2  | C  |
| -2.36165394 | -0.08762963 | -0.24235044 | 1 | 3  | C  |
| -1.18487204 | -0.09648513 | -0.16996554 | 1 | 4  | C  |
| -0.60778453 | -0.10369563 | -0.16043066 | 1 | 5  | C  |
| 2.25807486  | -0.08323901 | -0.30017380 | 1 | 6  | C  |
| -2.35147293 | 0.90604234  | -0.17191287 | 1 | 7  | C  |
| -1.18216426 | 0.89847310  | -0.10696408 | 1 | 8  | C  |
| -0.59945064 | 0.89538015  | -0.06463248 | 1 | 9  | C  |
| 2.26699954  | 0.90898012  | -0.18393654 | 1 | 10 | C  |
| 1.15922281  | 0.91719492  | -0.00222259 | 1 | 11 | C  |
| 0.57374539  | 0.91727465  | -0.00201467 | 1 | 12 | C  |
| -2.35144857 | -1.08825871 | -0.21784510 | 1 | 13 | C  |
| -1.18714199 | -1.09361086 | -0.18374342 | 1 | 14 | C  |
| -0.60636666 | -1.09838522 | -0.20255503 | 1 | 15 | C  |
| 2.26668042  | -1.08272921 | -0.24343325 | 1 | 16 | C  |
| 1.12382783  | -1.09473642 | -0.28779444 | 1 | 17 | C  |
| 0.53775711  | -1.09729088 | -0.27802172 | 1 | 18 | C  |
| -2.33940776 | -2.08906523 | -0.15884477 | 1 | 19 | C  |
| -1.18703848 | -2.09641414 | -0.12206845 | 1 | 20 | C  |
| -0.60824138 | -2.10048402 | -0.10739935 | 1 | 21 | C  |
| 2.28464175  | -2.08389660 | -0.15381894 | 1 | 22 | C  |
| 1.12972343  | -2.08108810 | -0.08812822 | 1 | 23 | C  |
| 0.55110977  | -2.08697357 | -0.08959608 | 1 | 24 | C  |
| 1.95775419  | 0.41700072  | -0.27747562 | 1 | 25 | C  |
| 1.37427210  | 0.46737083  | -0.27915937 | 1 | 26 | C  |
| 0.26079493  | 0.41020094  | -0.00186356 | 1 | 27 | C  |
| -2.05986984 | 0.40682066  | -0.18946620 | 1 | 28 | C  |
| -1.47925489 | 0.40319234  | -0.14802667 | 1 | 29 | C  |
| -0.31051508 | 0.37998875  | -0.06424317 | 1 | 30 | C  |
| 1.99841464  | 1.41718437  | -0.12391637 | 1 | 31 | C  |
| 1.42857931  | 1.42518546  | -0.04160142 | 1 | 32 | C  |
| 0.26954249  | 1.40824896  | -0.04366586 | 1 | 33 | C  |
| -2.05553199 | 1.40485458  | -0.14301328 | 1 | 34 | C  |
| -1.47447378 | 1.40086472  | -0.11876260 | 1 | 35 | C  |
| -0.31395442 | 1.39950097  | -0.06240096 | 1 | 36 | C  |
| 1.95998388  | -0.58464988 | -0.30942398 | 1 | 37 | C  |
| 1.38130193  | -0.59386651 | -0.34590265 | 1 | 38 | C  |
| 0.25662176  | -0.61100027 | -0.34404656 | 1 | 39 | C  |
| -2.06227062 | -0.58873113 | -0.22357406 | 1 | 40 | C  |
| -1.48158333 | -0.59348978 | -0.19984086 | 1 | 41 | C  |
| -0.30729165 | -0.59621301 | -0.24516789 | 1 | 42 | C  |
| 1.99003864  | -1.58501213 | -0.19163520 | 1 | 43 | C  |
| 1.41296421  | -1.58805184 | -0.18964471 | 1 | 44 | C  |
| 0.25633165  | -1.59443903 | -0.16567619 | 1 | 45 | C  |
| -2.05525608 | -1.58700620 | -0.17566120 | 1 | 46 | C  |
| -1.47641021 | -1.59295037 | -0.15737990 | 1 | 47 | C  |
| -0.32077773 | -1.59846576 | -0.15948675 | 1 | 48 | C  |
| -2.31317667 | 0.00000226  | 1.04123872  | 3 | 49 | Ru |
| -0.57879212 | -0.00000193 | 1.04164328  | 3 | 50 | Ru |
| 1.15528706  | 0.00000024  | 1.04632471  | 3 | 51 | Ru |
| -2.31317725 | 0.99999828  | 1.04123893  | 3 | 52 | Ru |
| -0.57879220 | 1.00000221  | 1.04164330  | 3 | 53 | Ru |
| 1.15528699  | 0.99999983  | 1.04632457  | 3 | 54 | Ru |
| -2.31322024 | -1.00000043 | 1.04123989  | 3 | 55 | Ru |
| -0.57879492 | -0.99999972 | 1.04164338  | 3 | 56 | Ru |
| 1.15528760  | -0.99999984 | 1.04632454  | 3 | 57 | Ru |
| -2.31322033 | -1.99999946 | 1.04123964  | 3 | 58 | Ru |
| -0.57879514 | -1.99999991 | 1.04164332  | 3 | 59 | Ru |

|             |             |            |   |     |    |
|-------------|-------------|------------|---|-----|----|
| 1.15528768  | -1.99999970 | 1.04632490 | 3 | 60  | Ru |
| 2.01826631  | 0.50000040  | 1.04156336 | 3 | 61  | Ru |
| 0.28627502  | 0.50000014  | 1.04304188 | 3 | 62  | Ru |
| -1.44460545 | 0.49999992  | 1.04609833 | 3 | 63  | Ru |
| 2.01827301  | 1.49998902  | 1.04155385 | 3 | 64  | Ru |
| 0.28627254  | 1.50000473  | 1.04304130 | 3 | 65  | Ru |
| -1.44461139 | 1.50000017  | 1.04608177 | 3 | 66  | Ru |
| 2.01826668  | -0.50000070 | 1.04156333 | 3 | 67  | Ru |
| 0.28627274  | -0.50000427 | 1.04304119 | 3 | 68  | Ru |
| -1.44461172 | -0.49999970 | 1.04608207 | 3 | 69  | Ru |
| 2.01826776  | -1.49999996 | 1.04156355 | 3 | 70  | Ru |
| 0.28627130  | -1.49999983 | 1.04304054 | 3 | 71  | Ru |
| -1.44460924 | -1.49999988 | 1.04608250 | 3 | 72  | Ru |
| 2.31592695  | 0.00000009  | 2.00527822 | 3 | 73  | Ru |
| 0.58417204  | -0.00000007 | 2.00632071 | 3 | 74  | Ru |
| -1.14788682 | -0.00000005 | 2.00559252 | 3 | 75  | Ru |
| 2.31592656  | 1.00000035  | 2.00527828 | 3 | 76  | Ru |
| 0.58417173  | 1.00000019  | 2.00632062 | 3 | 77  | Ru |
| -1.14788711 | 1.00000030  | 2.00559254 | 3 | 78  | Ru |
| 2.31592702  | -0.99999984 | 2.00527836 | 3 | 79  | Ru |
| 0.58417164  | -0.99999975 | 2.00632074 | 3 | 80  | Ru |
| -1.14788711 | -0.99999985 | 2.00559240 | 3 | 81  | Ru |
| 2.31592705  | -1.99999996 | 2.00527821 | 3 | 82  | Ru |
| 0.58417122  | -2.00000038 | 2.00632087 | 3 | 83  | Ru |
| -1.14788755 | -2.00000025 | 2.00559248 | 3 | 84  | Ru |
| -2.01489331 | 0.49999985  | 2.00616344 | 3 | 85  | Ru |
| -0.28261107 | 0.49999990  | 2.00576107 | 3 | 86  | Ru |
| 1.45230538  | 0.49999985  | 2.00586814 | 3 | 87  | Ru |
| -2.01489282 | 1.50000051  | 2.00616320 | 3 | 88  | Ru |
| -0.28261044 | 1.50000015  | 2.00576098 | 3 | 89  | Ru |
| 1.45230566  | 1.49999982  | 2.00586787 | 3 | 90  | Ru |
| -2.01489304 | -0.50000015 | 2.00616355 | 3 | 91  | Ru |
| -0.28261092 | -0.49999980 | 2.00576091 | 3 | 92  | Ru |
| 1.45230547  | -0.49999966 | 2.00586789 | 3 | 93  | Ru |
| -2.01489239 | -1.50000011 | 2.00616355 | 3 | 94  | Ru |
| -0.28261066 | -1.49999990 | 2.00576075 | 3 | 95  | Ru |
| 1.45230600  | -1.50000000 | 2.00586772 | 3 | 96  | Ru |
| -2.31268477 | -0.00000019 | 2.99128225 | 3 | 97  | Ru |
| -0.58078260 | -0.00000081 | 3.00213715 | 3 | 98  | Ru |
| 1.15389758  | -0.00000035 | 2.99982477 | 3 | 99  | Ru |
| -2.31268513 | 0.99999996  | 2.99128237 | 3 | 100 | Ru |
| -0.58078277 | 1.00000058  | 3.00213714 | 3 | 101 | Ru |
| 1.15389798  | 1.00000028  | 2.99982446 | 3 | 102 | Ru |
| -2.31268425 | -1.00000005 | 2.99128219 | 3 | 103 | Ru |
| -0.58078259 | -1.00000067 | 3.00213698 | 3 | 104 | Ru |
| 1.15389763  | -1.00000029 | 2.99982460 | 3 | 105 | Ru |
| -2.31268445 | -2.00000008 | 2.99128234 | 3 | 106 | Ru |
| -0.58078260 | -1.99999977 | 3.00213687 | 3 | 107 | Ru |
| 1.15389731  | -2.00000003 | 2.99982442 | 3 | 108 | Ru |
| 2.01934772  | 0.50000036  | 2.99815968 | 3 | 109 | Ru |
| 0.28729638  | 0.49999979  | 2.99234919 | 3 | 110 | Ru |
| -1.44342084 | 0.49999998  | 2.99519965 | 3 | 111 | Ru |
| 2.01934735  | 1.49999855  | 2.99815980 | 3 | 112 | Ru |
| 0.28729640  | 1.49999989  | 2.99234921 | 3 | 113 | Ru |
| -1.44342047 | 1.49999952  | 2.99519973 | 3 | 114 | Ru |
| 2.01934770  | -0.50000008 | 2.99815955 | 3 | 115 | Ru |
| 0.28729654  | -0.49999996 | 2.99234912 | 3 | 116 | Ru |
| -1.44342042 | -0.50000038 | 2.99519954 | 3 | 117 | Ru |
| 2.01934748  | -1.49999931 | 2.99815948 | 3 | 118 | Ru |
| 0.28729668  | -1.50000023 | 2.99234919 | 3 | 119 | Ru |
| -1.44342029 | -1.49999968 | 2.99519937 | 3 | 120 | Ru |
| 2.31018337  | -0.00000025 | 3.97747823 | 3 | 121 | Ru |

|             |             |            |   |     |    |
|-------------|-------------|------------|---|-----|----|
| 0.57746189  | -0.00000040 | 3.97629485 | 3 | 122 | Ru |
| -1.15795492 | -0.00000018 | 3.97952317 | 3 | 123 | Ru |
| 2.31018323  | 0.99999983  | 3.97747793 | 3 | 124 | Ru |
| 0.57743737  | 0.99998965  | 3.97628204 | 3 | 125 | Ru |
| -1.15795502 | 0.99999962  | 3.97952313 | 3 | 126 | Ru |
| 2.31018351  | -1.00000043 | 3.97747806 | 3 | 127 | Ru |
| 0.57741328  | -1.00000038 | 3.97626913 | 3 | 128 | Ru |
| -1.15795487 | -0.99999996 | 3.97952305 | 3 | 129 | Ru |
| 2.31018327  | -2.00000030 | 3.97747806 | 3 | 130 | Ru |
| 0.57743731  | -2.00001025 | 3.97628219 | 3 | 131 | Ru |
| -1.15795515 | -2.00000048 | 3.97952297 | 3 | 132 | Ru |
| -2.02178838 | 0.49999975  | 3.97571631 | 3 | 133 | Ru |
| -0.28901724 | 0.50000010  | 3.97942356 | 3 | 134 | Ru |
| 1.44083223  | 0.49999960  | 3.98029309 | 3 | 135 | Ru |
| -2.02178844 | 1.49999996  | 3.97571628 | 3 | 136 | Ru |
| -0.28901724 | 1.49999935  | 3.97942354 | 3 | 137 | Ru |
| 1.44083277  | 1.49999993  | 3.98029303 | 3 | 138 | Ru |
| -2.02178840 | -0.50000020 | 3.97571614 | 3 | 139 | Ru |
| -0.28901733 | -0.49999979 | 3.97942334 | 3 | 140 | Ru |
| 1.44083200  | -0.50000021 | 3.98029292 | 3 | 141 | Ru |
| -2.02178874 | -1.50000039 | 3.97571609 | 3 | 142 | Ru |
| -0.28901718 | -1.50000005 | 3.97942311 | 3 | 143 | Ru |
| 1.44083198  | -1.50000029 | 3.98029287 | 3 | 144 | Ru |

Penetration throughout 4 vacancy

|             |             |             |   |    |   |
|-------------|-------------|-------------|---|----|---|
| 0.58800000  | 0.00000000  | 0.23152296  | 2 | 1  | O |
| 0.58800000  | 0.00000000  | -0.23152296 | 1 | 2  | C |
| -2.29513521 | 0.00162886  | -0.00164524 | 1 | 3  | C |
| -1.08500566 | -0.00425167 | 0.00037259  | 1 | 4  | C |
| -0.45629516 | -0.02024968 | 0.00524386  | 1 | 5  | C |
| 2.33462125  | 0.01401771  | -0.00274775 | 1 | 6  | C |
| -2.30477139 | 1.00812325  | -0.00058585 | 1 | 7  | C |
| -1.14048276 | 0.99588160  | -0.00056643 | 1 | 8  | C |
| -0.55386270 | 0.99315533  | -0.00132640 | 1 | 9  | C |
| 2.31784579  | 1.02137166  | -0.00176574 | 1 | 10 | C |
| 1.16000000  | 1.00000000  | 0.00000000  | 1 | 11 | C |
| 0.58000000  | 1.00000000  | 0.00000000  | 1 | 12 | C |
| -2.30121769 | -0.98270430 | -0.00122600 | 1 | 13 | C |
| -1.13131401 | -0.99856789 | -0.00153313 | 1 | 14 | C |
| -0.55121851 | -1.01157123 | -0.00149912 | 1 | 15 | C |
| 2.31252637  | -0.97167287 | -0.00126826 | 1 | 16 | C |
| 1.08706442  | -0.89246975 | 0.00586897  | 1 | 17 | C |
| 0.46477617  | -0.94074343 | 0.00611795  | 1 | 18 | C |
| -2.31517378 | -1.98366890 | -0.00029760 | 1 | 19 | C |
| -1.15620943 | -2.00256129 | -0.00142369 | 1 | 20 | C |
| -0.57770607 | -2.01248847 | -0.00274299 | 1 | 21 | C |
| 2.29944528  | -1.96951049 | -0.00046912 | 1 | 22 | C |
| 1.15187461  | -1.96183720 | -0.00151177 | 1 | 23 | C |
| 0.57833293  | -1.98145265 | -0.00262143 | 1 | 24 | C |
| 2.03906616  | 0.51321828  | -0.00277299 | 1 | 25 | C |
| 1.47868624  | 0.48548004  | 0.00030531  | 1 | 26 | C |
| -2.02000000 | 0.50000000  | 0.00000000  | 1 | 27 | C |
| -1.41508612 | 0.49029059  | 0.00012140  | 1 | 28 | C |
| -0.23263695 | 0.52401534  | 0.00301771  | 1 | 29 | C |
| 2.02054622  | 1.52199181  | -0.00131391 | 1 | 30 | C |
| 1.44217630  | 1.52393123  | -0.00177936 | 1 | 31 | C |
| 0.30199553  | 1.50048902  | -0.00291919 | 1 | 32 | C |
| -2.02035640 | 1.51053861  | -0.00022321 | 1 | 33 | C |
| -1.44034026 | 1.49850690  | -0.00058521 | 1 | 34 | C |
| -0.27995341 | 1.50044732  | -0.00269201 | 1 | 35 | C |
| 2.01998204  | -0.46863947 | -0.00199929 | 1 | 36 | C |
| 1.45119246  | -0.41738645 | 0.00323628  | 1 | 37 | C |

|             |             |             |   |    |    |
|-------------|-------------|-------------|---|----|----|
| -1.99264161 | -0.49200261 | -0.00125040 | 1 | 38 | C  |
| -1.40534952 | -0.49275841 | -0.00072269 | 1 | 39 | C  |
| -0.17620474 | -0.57604594 | 0.00659547  | 1 | 40 | C  |
| 2.00083335  | -1.45857529 | -0.00052666 | 1 | 41 | C  |
| 1.41081453  | -1.43087628 | -0.00010948 | 1 | 42 | C  |
| 0.27678670  | -1.48610858 | -0.00217146 | 1 | 43 | C  |
| -2.01644879 | -1.48765418 | -0.00071023 | 1 | 44 | C  |
| -1.43510523 | -1.49534231 | -0.00130045 | 1 | 45 | C  |
| -0.29459063 | -1.52214659 | -0.00302699 | 1 | 46 | C  |
| -2.31317667 | 0.00000226  | 1.04123872  | 3 | 47 | Ru |
| -0.57879212 | -0.00000193 | 1.04164328  | 3 | 48 | Ru |
| 1.15528706  | 0.00000024  | 1.04632471  | 3 | 49 | Ru |
| -2.31317725 | 0.99999828  | 1.04123893  | 3 | 50 | Ru |
| -0.57879220 | 1.00000221  | 1.04164330  | 3 | 51 | Ru |
| 1.15528699  | 0.99999983  | 1.04632457  | 3 | 52 | Ru |
| -2.31322024 | -1.00000043 | 1.04123989  | 3 | 53 | Ru |
| -0.57879492 | -0.99999972 | 1.04164338  | 3 | 54 | Ru |
| 1.15528760  | -0.99999984 | 1.04632454  | 3 | 55 | Ru |
| -2.31322033 | -1.99999946 | 1.04123964  | 3 | 56 | Ru |
| -0.57879514 | -1.99999991 | 1.04164332  | 3 | 57 | Ru |
| 1.15528768  | -1.99999970 | 1.04632490  | 3 | 58 | Ru |
| 2.01826631  | 0.50000040  | 1.04156336  | 3 | 59 | Ru |
| 0.28627502  | 0.50000014  | 1.04304188  | 3 | 60 | Ru |
| -1.44460545 | 0.49999992  | 1.04609833  | 3 | 61 | Ru |
| 2.01827301  | 1.49998902  | 1.04155385  | 3 | 62 | Ru |
| 0.28627254  | 1.50000473  | 1.04304130  | 3 | 63 | Ru |
| -1.44461139 | 1.50000017  | 1.04608177  | 3 | 64 | Ru |
| 2.01826668  | -0.50000070 | 1.04156333  | 3 | 65 | Ru |
| 0.28627274  | -0.50000427 | 1.04304119  | 3 | 66 | Ru |
| -1.44461172 | -0.49999970 | 1.04608207  | 3 | 67 | Ru |
| 2.01826776  | -1.49999996 | 1.04156355  | 3 | 68 | Ru |
| 0.28627130  | -1.49999983 | 1.04304054  | 3 | 69 | Ru |
| -1.44460924 | -1.49999988 | 1.04608250  | 3 | 70 | Ru |
| 2.31592695  | 0.00000009  | 2.00527822  | 3 | 71 | Ru |
| 0.58417204  | -0.00000007 | 2.00632071  | 3 | 72 | Ru |
| -1.14788682 | -0.00000005 | 2.00559252  | 3 | 73 | Ru |
| 2.31592656  | 1.00000035  | 2.00527828  | 3 | 74 | Ru |
| 0.58417173  | 1.00000019  | 2.00632062  | 3 | 75 | Ru |
| -1.14788711 | 1.00000030  | 2.00559254  | 3 | 76 | Ru |
| 2.31592702  | -0.99999984 | 2.00527836  | 3 | 77 | Ru |
| 0.58417164  | -0.99999975 | 2.00632074  | 3 | 78 | Ru |
| -1.14788711 | -0.99999985 | 2.00559240  | 3 | 79 | Ru |
| 2.31592705  | -1.99999996 | 2.00527821  | 3 | 80 | Ru |
| 0.58417122  | -2.00000038 | 2.00632087  | 3 | 81 | Ru |
| -1.14788755 | -2.00000025 | 2.00559248  | 3 | 82 | Ru |
| -2.01489331 | 0.49999985  | 2.00616344  | 3 | 83 | Ru |
| -0.28261107 | 0.49999990  | 2.00576107  | 3 | 84 | Ru |
| 1.45230538  | 0.49999985  | 2.00586814  | 3 | 85 | Ru |
| -2.01489282 | 1.50000051  | 2.00616320  | 3 | 86 | Ru |
| -0.28261044 | 1.50000015  | 2.00576098  | 3 | 87 | Ru |
| 1.45230566  | 1.49999982  | 2.00586787  | 3 | 88 | Ru |
| -2.01489304 | -0.50000015 | 2.00616355  | 3 | 89 | Ru |
| -0.28261092 | -0.49999980 | 2.00576091  | 3 | 90 | Ru |
| 1.45230547  | -0.49999966 | 2.00586789  | 3 | 91 | Ru |
| -2.01489239 | -1.50000011 | 2.00616355  | 3 | 92 | Ru |
| -0.28261066 | -1.49999990 | 2.00576075  | 3 | 93 | Ru |
| 1.45230600  | -1.50000000 | 2.00586772  | 3 | 94 | Ru |
| -2.31268477 | -0.00000019 | 2.99128225  | 3 | 95 | Ru |
| -0.58078260 | -0.00000081 | 3.00213715  | 3 | 96 | Ru |
| 1.15389758  | -0.00000035 | 2.99982477  | 3 | 97 | Ru |
| -2.31268513 | 0.99999996  | 2.99128237  | 3 | 98 | Ru |
| -0.58078277 | 1.00000058  | 3.00213714  | 3 | 99 | Ru |

|             |             |            |   |     |    |
|-------------|-------------|------------|---|-----|----|
| 1.15389798  | 1.00000028  | 2.99982446 | 3 | 100 | Ru |
| -2.31268425 | -1.00000005 | 2.99128219 | 3 | 101 | Ru |
| -0.58078259 | -1.00000067 | 3.00213698 | 3 | 102 | Ru |
| 1.15389763  | -1.00000029 | 2.99982460 | 3 | 103 | Ru |
| -2.31268445 | -2.00000008 | 2.99128234 | 3 | 104 | Ru |
| -0.58078260 | -1.99999977 | 3.00213687 | 3 | 105 | Ru |
| 1.15389731  | -2.00000003 | 2.99982442 | 3 | 106 | Ru |
| 2.01934772  | 0.50000036  | 2.99815968 | 3 | 107 | Ru |
| 0.28729638  | 0.49999979  | 2.99234919 | 3 | 108 | Ru |
| -1.44342084 | 0.49999998  | 2.99519965 | 3 | 109 | Ru |
| 2.01934735  | 1.49999855  | 2.99815980 | 3 | 110 | Ru |
| 0.28729640  | 1.49999989  | 2.99234921 | 3 | 111 | Ru |
| -1.44342047 | 1.49999952  | 2.99519973 | 3 | 112 | Ru |
| 2.01934770  | -0.50000008 | 2.99815955 | 3 | 113 | Ru |
| 0.28729654  | -0.49999996 | 2.99234912 | 3 | 114 | Ru |
| -1.44342042 | -0.50000038 | 2.99519954 | 3 | 115 | Ru |
| 2.01934748  | -1.49999931 | 2.99815948 | 3 | 116 | Ru |
| 0.28729668  | -1.50000023 | 2.99234919 | 3 | 117 | Ru |
| -1.44342029 | -1.49999968 | 2.99519937 | 3 | 118 | Ru |
| 2.31018337  | -0.00000025 | 3.97747823 | 3 | 119 | Ru |
| 0.57746189  | -0.00000040 | 3.97629485 | 3 | 120 | Ru |
| -1.15795492 | -0.00000018 | 3.97952317 | 3 | 121 | Ru |
| 2.31018323  | 0.99999983  | 3.97747793 | 3 | 122 | Ru |
| 0.57743737  | 0.99998965  | 3.97628204 | 3 | 123 | Ru |
| -1.15795502 | 0.99999962  | 3.97952313 | 3 | 124 | Ru |
| 2.31018351  | -1.00000043 | 3.97747806 | 3 | 125 | Ru |
| 0.57741328  | -1.00000038 | 3.97626913 | 3 | 126 | Ru |
| -1.15795487 | -0.99999996 | 3.97952305 | 3 | 127 | Ru |
| 2.31018327  | -2.00000030 | 3.97747806 | 3 | 128 | Ru |
| 0.57743731  | -2.00001025 | 3.97628219 | 3 | 129 | Ru |
| -1.15795515 | -2.00000048 | 3.97952297 | 3 | 130 | Ru |
| -2.02178838 | 0.49999975  | 3.97571631 | 3 | 131 | Ru |
| -0.28901724 | 0.50000010  | 3.97942356 | 3 | 132 | Ru |
| 1.44083223  | 0.49999960  | 3.98029309 | 3 | 133 | Ru |
| -2.02178844 | 1.49999996  | 3.97571628 | 3 | 134 | Ru |
| -0.28901724 | 1.49999935  | 3.97942354 | 3 | 135 | Ru |
| 1.44083277  | 1.49999993  | 3.98029303 | 3 | 136 | Ru |
| -2.02178840 | -0.50000020 | 3.97571614 | 3 | 137 | Ru |
| -0.28901733 | -0.49999979 | 3.97942334 | 3 | 138 | Ru |
| 1.44083200  | -0.50000021 | 3.98029292 | 3 | 139 | Ru |
| -2.02178874 | -1.50000039 | 3.97571609 | 3 | 140 | Ru |
| -0.28901718 | -1.50000005 | 3.97942311 | 3 | 141 | Ru |
| 1.44083198  | -1.50000029 | 3.98029287 | 3 | 142 | Ru |

Adsorption on 4vacancy

1)

|             |             |             |   |    |   |
|-------------|-------------|-------------|---|----|---|
| -0.46062735 | -0.02717188 | -1.05587244 | 2 | 1  | O |
| -0.45833536 | -0.02601916 | -1.52412567 | 1 | 2  | C |
| -2.30049437 | 0.00361405  | 0.02948203  | 1 | 3  | C |
| -1.08792427 | -0.00742862 | 0.01942439  | 1 | 4  | C |
| -0.47556534 | -0.01460755 | 0.03383222  | 1 | 5  | C |
| 2.31752322  | 0.01844475  | 0.06282838  | 1 | 6  | C |
| -2.30617421 | 1.00954734  | -0.00357418 | 1 | 7  | C |
| -1.14224666 | 0.99605444  | -0.01800120 | 1 | 8  | C |
| -0.55987218 | 0.99690204  | -0.01918158 | 1 | 9  | C |
| 2.31481191  | 1.01900508  | -0.00843097 | 1 | 10 | C |
| 1.16000000  | 1.00000000  | 0.00000000  | 1 | 11 | C |
| 0.58000000  | 1.00000000  | 0.00000000  | 1 | 12 | C |
| -2.30641054 | -0.98500465 | 0.01066987  | 1 | 13 | C |
| -1.12767050 | -0.99644477 | 0.02125212  | 1 | 14 | C |
| -0.54471306 | -1.00826861 | 0.04963506  | 1 | 15 | C |
| 2.30733448  | -0.97412380 | 0.02230170  | 1 | 16 | C |

|             |             |             |   |    |    |
|-------------|-------------|-------------|---|----|----|
| 1.08295230  | -0.93352169 | 0.03707712  | 1 | 17 | C  |
| 0.46477617  | -0.94074343 | 0.00611795  | 1 | 18 | C  |
| -2.31517378 | -1.98366890 | -0.00029760 | 1 | 19 | C  |
| -1.15620943 | -2.00256129 | -0.00142369 | 1 | 20 | C  |
| -0.57770607 | -2.01248847 | -0.00274299 | 1 | 21 | C  |
| 2.29863426  | -1.96883582 | 0.00020287  | 1 | 22 | C  |
| 1.15187461  | -1.96183720 | -0.00151177 | 1 | 23 | C  |
| 0.57469394  | -1.98294023 | -0.01961098 | 1 | 24 | C  |
| 2.02865482  | 0.52346946  | 0.04209837  | 1 | 25 | C  |
| 1.46569806  | 0.53877375  | 0.11257334  | 1 | 26 | C  |
| -2.02000000 | 0.50000000  | 0.00000000  | 1 | 27 | C  |
| -1.41945770 | 0.48990289  | 0.00749467  | 1 | 28 | C  |
| -0.23263695 | 0.52401534  | 0.00301771  | 1 | 29 | C  |
| 2.02054622  | 1.52199181  | -0.00131391 | 1 | 30 | C  |
| 1.44217630  | 1.52393123  | -0.00177936 | 1 | 31 | C  |
| 0.30199553  | 1.50048902  | -0.00291919 | 1 | 32 | C  |
| -2.02035640 | 1.51053861  | -0.00022321 | 1 | 33 | C  |
| -1.44034026 | 1.49850690  | -0.00058521 | 1 | 34 | C  |
| -0.28066831 | 1.50178531  | -0.00591255 | 1 | 35 | C  |
| 2.00914834  | -0.47964437 | 0.07014223  | 1 | 36 | C  |
| 1.43052844  | -0.47276606 | 0.10821964  | 1 | 37 | C  |
| -1.99749453 | -0.49220475 | 0.01465428  | 1 | 38 | C  |
| -1.41343676 | -0.49433440 | 0.02039133  | 1 | 39 | C  |
| -0.15156852 | -0.56294912 | 0.07167342  | 1 | 40 | C  |
| 1.99744550  | -1.46168948 | 0.01966845  | 1 | 41 | C  |
| 1.40392138  | -1.44283829 | 0.01278561  | 1 | 42 | C  |
| 0.27142526  | -1.49071841 | -0.00227818 | 1 | 43 | C  |
| -2.01830809 | -1.48482129 | -0.00268029 | 1 | 44 | C  |
| -1.43516439 | -1.49423164 | 0.01200870  | 1 | 45 | C  |
| -0.29581456 | -1.52101216 | 0.00722942  | 1 | 46 | C  |
| -2.31317667 | 0.00000226  | 1.04123872  | 3 | 47 | Ru |
| -0.54343650 | 0.01418162  | 1.06029564  | 3 | 48 | Ru |
| 1.14320859  | 0.03547405  | 0.68386325  | 3 | 49 | Ru |
| -2.31798879 | 0.99538643  | 1.13262119  | 3 | 50 | Ru |
| -0.54744826 | 0.98082858  | 1.13829917  | 3 | 51 | Ru |
| 1.11574536  | 0.94761636  | 1.13656094  | 3 | 52 | Ru |
| -2.31193306 | -0.99773066 | 1.13333626  | 3 | 53 | Ru |
| -0.56711527 | -0.99126287 | 1.11609418  | 3 | 54 | Ru |
| 1.14833495  | -0.96354257 | 1.07396170  | 3 | 55 | Ru |
| -2.31411586 | -2.00324875 | 1.10824845  | 3 | 56 | Ru |
| -0.57267042 | -1.99993646 | 1.12755694  | 3 | 57 | Ru |
| 1.15088179  | -2.00718568 | 1.08802283  | 3 | 58 | Ru |
| 1.99279634  | 0.48196618  | 1.15604228  | 3 | 59 | Ru |
| 0.28446617  | 0.54748755  | 0.61233988  | 3 | 60 | Ru |
| -1.44451833 | 0.50248794  | 1.09597849  | 3 | 61 | Ru |
| 2.00846622  | 1.48641570  | 1.09160663  | 3 | 62 | Ru |
| 0.28797351  | 1.47925372  | 1.11878319  | 3 | 63 | Ru |
| -1.43132472 | 1.49612375  | 1.10590764  | 3 | 64 | Ru |
| 2.01826668  | -0.50000070 | 1.04156333  | 3 | 65 | Ru |
| 0.28526885  | -0.49578309 | 0.84810613  | 3 | 66 | Ru |
| -1.43593584 | -0.49707888 | 1.11268398  | 3 | 67 | Ru |
| 2.01945062  | -1.50441632 | 1.09739906  | 3 | 68 | Ru |
| 0.29551133  | -1.49082948 | 1.13805268  | 3 | 69 | Ru |
| -1.44105069 | -1.50235464 | 1.09382864  | 3 | 70 | Ru |
| 2.31458471  | -0.00394228 | 1.99725089  | 3 | 71 | Ru |
| 0.58087458  | 0.03111780  | 1.68277394  | 3 | 72 | Ru |
| -1.14098469 | 0.00066043  | 1.94951687  | 3 | 73 | Ru |
| 2.30183798  | 0.99902431  | 2.02198946  | 3 | 74 | Ru |
| 0.57970707  | 0.98118878  | 2.07625112  | 3 | 75 | Ru |
| -1.14767799 | 0.99349005  | 2.01752747  | 3 | 76 | Ru |
| 2.29735070  | -0.99423473 | 2.00411790  | 3 | 77 | Ru |
| 0.58116186  | -0.96996751 | 2.06253689  | 3 | 78 | Ru |

|             |             |            |   |     |    |
|-------------|-------------|------------|---|-----|----|
| -1.14666599 | -0.99170762 | 2.03125362 | 3 | 79  | Ru |
| 2.29857414  | -1.99683539 | 2.04289357 | 3 | 80  | Ru |
| 0.58308848  | -1.99640561 | 2.03780942 | 3 | 81  | Ru |
| -1.14981107 | -1.99857966 | 2.03047844 | 3 | 82  | Ru |
| -2.01994707 | 0.49523623  | 2.03645264 | 3 | 83  | Ru |
| -0.27266482 | 0.48988672  | 2.09077955 | 3 | 84  | Ru |
| 1.42241054  | 0.48410364  | 2.08321006 | 3 | 85  | Ru |
| -2.02314899 | 1.50111036  | 2.04761979 | 3 | 86  | Ru |
| -0.28622955 | 1.49908749  | 2.00011845 | 3 | 87  | Ru |
| 1.43778145  | 1.49855069  | 1.96670403 | 3 | 88  | Ru |
| -2.01676790 | -0.49598556 | 2.04339916 | 3 | 89  | Ru |
| -0.27170472 | -0.48563334 | 2.07277570 | 3 | 90  | Ru |
| 1.41899593  | -0.48048967 | 2.05026878 | 3 | 91  | Ru |
| -2.02499748 | -1.49971022 | 2.02974652 | 3 | 92  | Ru |
| -0.28610878 | -1.49556284 | 2.00300361 | 3 | 93  | Ru |
| 1.43459418  | -1.48997566 | 1.95106147 | 3 | 94  | Ru |
| -2.30908862 | 0.00070374  | 2.98129010 | 3 | 95  | Ru |
| -0.57994961 | -0.00051103 | 2.97128015 | 3 | 96  | Ru |
| 1.16151934  | 0.00064042  | 3.04324670 | 3 | 97  | Ru |
| -2.30989134 | 0.99980075  | 2.94883466 | 3 | 98  | Ru |
| -0.57549621 | 1.00484203  | 2.97635231 | 3 | 99  | Ru |
| 1.15871356  | 1.00747671  | 2.94373334 | 3 | 100 | Ru |
| -2.31225667 | -1.00076551 | 2.94120750 | 3 | 101 | Ru |
| -0.57261549 | -1.00266033 | 2.95591669 | 3 | 102 | Ru |
| 1.15977787  | -1.00334846 | 2.93143386 | 3 | 103 | Ru |
| -2.31096745 | -1.99928101 | 2.94623709 | 3 | 104 | Ru |
| -0.57693610 | -1.99756939 | 3.06253896 | 3 | 105 | Ru |
| 1.15226418  | -1.99782009 | 3.00674399 | 3 | 106 | Ru |
| 2.02604095  | 0.49788788  | 2.92824929 | 3 | 107 | Ru |
| 0.29828307  | 0.49532165  | 2.96766245 | 3 | 108 | Ru |
| -1.44002844 | 0.49903094  | 2.95113625 | 3 | 109 | Ru |
| 2.02129572  | 1.50023318  | 2.99274464 | 3 | 110 | Ru |
| 0.28224278  | 1.50526926  | 2.91110421 | 3 | 111 | Ru |
| -1.43573047 | 1.49950807  | 2.92880874 | 3 | 112 | Ru |
| 2.02325430  | -0.49673767 | 2.91752008 | 3 | 113 | Ru |
| 0.29929890  | -0.48993060 | 2.95148274 | 3 | 114 | Ru |
| -1.44059735 | -0.50079948 | 2.98039085 | 3 | 115 | Ru |
| 2.02133849  | -1.49750682 | 2.99231489 | 3 | 116 | Ru |
| 0.28526378  | -1.49971629 | 2.90880773 | 3 | 117 | Ru |
| -1.43864084 | -1.50048204 | 2.92983352 | 3 | 118 | Ru |
| 2.30690561  | -0.00061317 | 3.86633790 | 3 | 119 | Ru |
| 0.57552189  | 0.00014661  | 3.89943337 | 3 | 120 | Ru |
| -1.15928438 | 0.00021964  | 3.88583544 | 3 | 121 | Ru |
| 2.31358198  | 1.00086037  | 3.89001968 | 3 | 122 | Ru |
| 0.57937511  | 1.00110766  | 3.86425547 | 3 | 123 | Ru |
| -1.15547392 | 0.99956224  | 3.89496891 | 3 | 124 | Ru |
| 2.31171374  | -1.00124637 | 3.88734602 | 3 | 125 | Ru |
| 0.57875765  | -1.00068073 | 3.85776505 | 3 | 126 | Ru |
| -1.15577853 | -0.99974104 | 3.89286429 | 3 | 127 | Ru |
| 2.31488425  | -2.00036749 | 3.89334815 | 3 | 128 | Ru |
| 0.58008411  | -1.99920417 | 3.88545457 | 3 | 129 | Ru |
| -1.15447246 | -1.99936225 | 3.91762713 | 3 | 130 | Ru |
| -2.02415748 | 0.49880254  | 3.88327597 | 3 | 131 | Ru |
| -0.28922115 | 0.49801045  | 3.89266842 | 3 | 132 | Ru |
| 1.44463255  | 0.50067753  | 3.90225483 | 3 | 133 | Ru |
| -2.02027837 | 1.49972413  | 3.86731296 | 3 | 134 | Ru |
| -0.28442928 | 1.49617774  | 3.90929963 | 3 | 135 | Ru |
| 1.44640919  | 1.50194363  | 3.90387528 | 3 | 136 | Ru |
| -2.02466282 | -0.49869154 | 3.87640177 | 3 | 137 | Ru |
| -0.28927262 | -0.49744869 | 3.88404552 | 3 | 138 | Ru |
| 1.44457672  | -0.50130428 | 3.90501265 | 3 | 139 | Ru |
| -2.02177189 | -1.49909519 | 3.86812723 | 3 | 140 | Ru |



|             |             |            |   |     |    |
|-------------|-------------|------------|---|-----|----|
| -0.28420205 | -1.49621160 | 3.91092263 | 3 | 141 | Ru |
| 1.44614272  | -1.50151609 | 3.90178455 | 3 | 142 | Ru |

2)

|             |             |             |   |    |    |
|-------------|-------------|-------------|---|----|----|
| -0.45266263 | -0.00994502 | -1.16251824 | 2 | 1  | O  |
| -0.46914310 | -0.03915991 | -1.63092886 | 1 | 2  | C  |
| -2.31150715 | 0.00208084  | -0.04232944 | 1 | 3  | C  |
| -1.10977719 | 0.00376534  | -0.10732943 | 1 | 4  | C  |
| -0.50924575 | 0.00273239  | -0.10191175 | 1 | 5  | C  |
| 2.31200665  | 0.01142013  | -0.06640227 | 1 | 6  | C  |
| -2.30293375 | 1.01139683  | -0.06540774 | 1 | 7  | C  |
| -1.14058767 | 1.00030511  | -0.09501300 | 1 | 8  | C  |
| -0.55582321 | 0.99626388  | -0.08952193 | 1 | 9  | C  |
| 2.31655726  | 1.01635363  | -0.07137040 | 1 | 10 | C  |
| 1.16000000  | 1.00000000  | -0.05000000 | 1 | 11 | C  |
| 0.58000000  | 1.00000000  | -0.05000000 | 1 | 12 | C  |
| -2.31337081 | -0.98959413 | -0.06430769 | 1 | 13 | C  |
| -1.14873325 | -0.99620619 | -0.06651405 | 1 | 14 | C  |
| -0.57473817 | -0.99994469 | -0.09173060 | 1 | 15 | C  |
| 2.31201592  | -0.97919803 | -0.07195719 | 1 | 16 | C  |
| 1.08865721  | -0.94397305 | -0.07610790 | 1 | 17 | C  |
| 0.46477617  | -0.94074343 | -0.05611795 | 1 | 18 | C  |
| -2.31517378 | -1.98366890 | -0.05029760 | 1 | 19 | C  |
| -1.15620943 | -2.00256129 | -0.05142369 | 1 | 20 | C  |
| -0.57770607 | -2.01248847 | -0.05274299 | 1 | 21 | C  |
| 2.30444504  | -1.97343925 | -0.03772037 | 1 | 22 | C  |
| 1.15187461  | -1.96183720 | -0.05151177 | 1 | 23 | C  |
| 0.56989090  | -1.97744839 | -0.07217721 | 1 | 24 | C  |
| 2.03066345  | 0.51612505  | -0.07046877 | 1 | 25 | C  |
| 1.46842467  | 0.51718404  | 0.01738992  | 1 | 26 | C  |
| -2.02000000 | 0.50000000  | -0.05000000 | 1 | 27 | C  |
| -1.42686930 | 0.49544311  | -0.10235563 | 1 | 28 | C  |
| -0.23263695 | 0.52401534  | -0.05301771 | 1 | 29 | C  |
| 2.02054622  | 1.52199181  | -0.05131391 | 1 | 30 | C  |
| 1.44217630  | 1.52393123  | -0.05177936 | 1 | 31 | C  |
| 0.30199553  | 1.50048902  | -0.05291919 | 1 | 32 | C  |
| -2.02035640 | 1.51053861  | -0.05022321 | 1 | 33 | C  |
| -1.44034026 | 1.49850690  | -0.05058521 | 1 | 34 | C  |
| -0.28000945 | 1.49751203  | -0.04512666 | 1 | 35 | C  |
| 2.00808638  | -0.47657757 | -0.06477360 | 1 | 36 | C  |
| 1.43228843  | -0.48262460 | -0.01488749 | 1 | 37 | C  |
| -2.01212476 | -0.49037890 | -0.05387536 | 1 | 38 | C  |
| -1.42663483 | -0.49023936 | -0.07869713 | 1 | 39 | C  |
| -0.24896060 | -0.52828660 | -0.08457929 | 1 | 40 | C  |
| 2.00300216  | -1.46192090 | -0.05046033 | 1 | 41 | C  |
| 1.41122052  | -1.44803550 | -0.07859453 | 1 | 42 | C  |
| 0.26501550  | -1.47972945 | -0.09021132 | 1 | 43 | C  |
| -2.02379756 | -1.49120681 | -0.05906494 | 1 | 44 | C  |
| -1.44487229 | -1.49696059 | -0.03268027 | 1 | 45 | C  |
| -0.30533336 | -1.50936896 | -0.07393783 | 1 | 46 | C  |
| -2.31317667 | 0.00000226  | 1.04123872  | 3 | 47 | Ru |
| -0.44992568 | -0.00475726 | 1.11239273  | 3 | 48 | Ru |
| 1.14284399  | -0.00000793 | 0.55464351  | 3 | 49 | Ru |
| -2.31103341 | 0.99531835  | 1.13685336  | 3 | 50 | Ru |
| -0.57503298 | 0.98223203  | 1.14626119  | 3 | 51 | Ru |
| 1.10164274  | 0.93034827  | 0.96338410  | 3 | 52 | Ru |
| -2.26022551 | -0.98851399 | 1.09568922  | 3 | 53 | Ru |
| -0.57435520 | -1.02381835 | 1.18251927  | 3 | 54 | Ru |
| 1.08910956  | -0.93878900 | 0.97806364  | 3 | 55 | Ru |
| -2.44114090 | -2.00926087 | 1.22479482  | 3 | 56 | Ru |
| -0.54674608 | -2.01061919 | 0.79510705  | 3 | 57 | Ru |
| 1.09752930  | -1.98482520 | 0.79301636  | 3 | 58 | Ru |

|             |             |            |   |     |    |
|-------------|-------------|------------|---|-----|----|
| 1.96870179  | 0.50456396  | 1.15445068 | 3 | 59  | Ru |
| 0.27834503  | 0.50241752  | 0.54671766 | 3 | 60  | Ru |
| -1.42968598 | 0.50856680  | 0.76382713 | 3 | 61  | Ru |
| 2.00919001  | 1.45975877  | 0.80547772 | 3 | 62  | Ru |
| 0.30019889  | 1.46917323  | 1.13947077 | 3 | 63  | Ru |
| -1.45333595 | 1.47729060  | 1.07094186 | 3 | 64  | Ru |
| 2.01826668  | -0.50000070 | 1.04156333 | 3 | 65  | Ru |
| 0.23837992  | -0.53269370 | 0.61972176 | 3 | 66  | Ru |
| -1.37587689 | -0.50201711 | 0.78950309 | 3 | 67  | Ru |
| 1.99853483  | -1.48472660 | 0.85228016 | 3 | 68  | Ru |
| 0.28528833  | -1.53142014 | 1.20795765 | 3 | 69  | Ru |
| -1.46218975 | -1.52435137 | 0.95993813 | 3 | 70  | Ru |
| 2.31096651  | -0.00315094 | 1.93243231 | 3 | 71  | Ru |
| 0.56668893  | 0.03781836  | 1.50163468 | 3 | 72  | Ru |
| -1.20138472 | 0.05489123  | 1.75794697 | 3 | 73  | Ru |
| 2.26324039  | 1.03319870  | 2.05468173 | 3 | 74  | Ru |
| 0.56439727  | 0.96507262  | 2.02245356 | 3 | 75  | Ru |
| -1.15250620 | 1.03522272  | 2.03555635 | 3 | 76  | Ru |
| 2.27293527  | -1.02780406 | 1.86936354 | 3 | 77  | Ru |
| 0.55063340  | -0.95953621 | 2.00956726 | 3 | 78  | Ru |
| -1.15804397 | -0.93222852 | 2.02857520 | 3 | 79  | Ru |
| 2.20075440  | -1.95951122 | 2.25047779 | 3 | 80  | Ru |
| 0.63756610  | -2.00952529 | 2.15276878 | 3 | 81  | Ru |
| -1.14176532 | -1.95593048 | 1.83294125 | 3 | 82  | Ru |
| -2.05414671 | 0.52003765  | 2.03364831 | 3 | 83  | Ru |
| -0.29514421 | 0.50922157  | 2.16828168 | 3 | 84  | Ru |
| 1.38899116  | 0.44905290  | 2.10778651 | 3 | 85  | Ru |
| -2.04464667 | 1.53260809  | 2.08960854 | 3 | 86  | Ru |
| -0.27674721 | 1.53275745  | 1.94475902 | 3 | 87  | Ru |
| 1.45085811  | 1.49252115  | 1.74785754 | 3 | 88  | Ru |
| -2.01433234 | -0.47907936 | 2.02455086 | 3 | 89  | Ru |
| -0.27699530 | -0.44712378 | 2.05344867 | 3 | 90  | Ru |
| 1.39258108  | -0.47114168 | 1.90706104 | 3 | 91  | Ru |
| -2.04524342 | -1.49390776 | 1.99048063 | 3 | 92  | Ru |
| -0.30356906 | -1.52193151 | 2.11025874 | 3 | 93  | Ru |
| 1.40928471  | -1.52206106 | 1.75949894 | 3 | 94  | Ru |
| -2.30377062 | -0.03823192 | 3.03886325 | 3 | 95  | Ru |
| -0.59299912 | 0.00077532  | 3.06813615 | 3 | 96  | Ru |
| 1.22932810  | -0.03508021 | 3.36741355 | 3 | 97  | Ru |
| -2.30980151 | 0.99429683  | 2.94212569 | 3 | 98  | Ru |
| -0.58442421 | 1.01482562  | 3.09961864 | 3 | 99  | Ru |
| 1.16415901  | 1.09359712  | 2.85598714 | 3 | 100 | Ru |
| -2.32590656 | -1.01318084 | 2.84937104 | 3 | 101 | Ru |
| -0.59026274 | -0.97417487 | 2.91660568 | 3 | 102 | Ru |
| 1.19648430  | -1.05356032 | 2.78959359 | 3 | 103 | Ru |
| -2.32393139 | -1.99458926 | 3.04596194 | 3 | 104 | Ru |
| -0.62913416 | -1.93234195 | 3.32724065 | 3 | 105 | Ru |
| 1.12141449  | -1.96615304 | 3.23448317 | 3 | 106 | Ru |
| 2.00845428  | 0.49913010  | 2.93804668 | 3 | 107 | Ru |
| 0.37150342  | 0.46558369  | 2.98925222 | 3 | 108 | Ru |
| -1.43276740 | 0.41663788  | 2.82265385 | 3 | 109 | Ru |
| 1.99538124  | 1.51813840  | 3.17604957 | 3 | 110 | Ru |
| 0.22261361  | 1.50455165  | 2.92770148 | 3 | 111 | Ru |
| -1.41466827 | 1.49997503  | 2.94135754 | 3 | 112 | Ru |
| 2.00107618  | -0.49491344 | 2.78505543 | 3 | 113 | Ru |
| 0.36610059  | -0.46665290 | 2.92132286 | 3 | 114 | Ru |
| -1.45317262 | -0.58739895 | 3.26149023 | 3 | 115 | Ru |
| 2.02059886  | -1.40891139 | 3.26521042 | 3 | 116 | Ru |
| 0.25384300  | -1.50510565 | 2.96340536 | 3 | 117 | Ru |
| -1.41278957 | -1.52646208 | 2.80725176 | 3 | 118 | Ru |
| 2.18822153  | -0.07739356 | 3.82485295 | 3 | 119 | Ru |
| 0.56001580  | -0.02231663 | 4.16706384 | 3 | 120 | Ru |

|             |             |            |   |     |    |
|-------------|-------------|------------|---|-----|----|
| -1.12982554 | 0.00038323  | 4.11170089 | 3 | 121 | Ru |
| 2.32273150  | 0.93243112  | 3.95612332 | 3 | 122 | Ru |
| 0.66177554  | 0.97794622  | 3.82769906 | 3 | 123 | Ru |
| -1.13643202 | 0.98848975  | 3.99933969 | 3 | 124 | Ru |
| 2.34713214  | -1.01325878 | 4.20301380 | 3 | 125 | Ru |
| 0.69621370  | -0.98784713 | 3.78890736 | 3 | 126 | Ru |
| -1.12492180 | -0.97947679 | 4.22728490 | 3 | 127 | Ru |
| 2.38121819  | -2.00248926 | 4.01155071 | 3 | 128 | Ru |
| 0.58229046  | -2.00925855 | 4.09995146 | 3 | 129 | Ru |
| -1.16795244 | -2.01455011 | 4.27996907 | 3 | 130 | Ru |
| -1.99611579 | 0.47635180  | 3.84402034 | 3 | 131 | Ru |
| -0.25014561 | 0.47400019  | 3.91382817 | 3 | 132 | Ru |
| 1.45095551  | 0.49565757  | 4.29831519 | 3 | 133 | Ru |
| -1.98048743 | 1.49975375  | 3.87408218 | 3 | 134 | Ru |
| -0.26295337 | 1.47623862  | 4.09671018 | 3 | 135 | Ru |
| 1.48600844  | 1.49175385  | 4.11992232 | 3 | 136 | Ru |
| -2.06256519 | -0.47905508 | 4.08747487 | 3 | 137 | Ru |
| -0.25963035 | -0.56788940 | 3.84154038 | 3 | 138 | Ru |
| 1.42227157  | -0.52199362 | 4.35254945 | 3 | 139 | Ru |
| -1.89944181 | -1.45408209 | 3.80215688 | 3 | 140 | Ru |
| -0.24945616 | -1.48835609 | 4.17813502 | 3 | 141 | Ru |
| 1.47517339  | -1.51615660 | 4.19055101 | 3 | 142 | Ru |

3)

|             |             |             |   |    |   |
|-------------|-------------|-------------|---|----|---|
| -0.46142371 | -0.01081358 | -1.21017883 | 2 | 1  | O |
| -0.46375272 | -0.03506143 | -1.69044138 | 1 | 2  | C |
| -2.31411521 | 0.00191109  | -0.12157302 | 1 | 3  | C |
| -1.10749673 | -0.00005437 | -0.15283160 | 1 | 4  | C |
| -0.50275107 | -0.00105598 | -0.14780328 | 1 | 5  | C |
| 2.31873035  | 0.01522305  | -0.11749755 | 1 | 6  | C |
| -2.30608075 | 1.01022178  | -0.10460827 | 1 | 7  | C |
| -1.14181152 | 0.99812750  | -0.13355128 | 1 | 8  | C |
| -0.55728538 | 0.99272113  | -0.13641994 | 1 | 9  | C |
| 2.31685330  | 1.02015292  | -0.12921375 | 1 | 10 | C |
| 1.16000000  | 1.00000000  | -0.10000000 | 1 | 11 | C |
| 0.58000000  | 1.00000000  | -0.10000000 | 1 | 12 | C |
| -2.30623180 | -0.98579851 | -0.11663636 | 1 | 13 | C |
| -1.14738396 | -0.99825044 | -0.13242899 | 1 | 14 | C |
| -0.57123025 | -0.99950600 | -0.14374724 | 1 | 15 | C |
| 2.30923740  | -0.97086074 | -0.12217565 | 1 | 16 | C |
| 1.08771197  | -0.93786746 | -0.12616140 | 1 | 17 | C |
| 0.46477617  | -0.94074343 | -0.10611795 | 1 | 18 | C |
| -2.31517378 | -1.98366890 | -0.10029760 | 1 | 19 | C |
| -1.15620943 | -2.00256129 | -0.10142369 | 1 | 20 | C |
| -0.57770607 | -2.01248847 | -0.10274299 | 1 | 21 | C |
| 2.30367397  | -1.96584101 | -0.08382131 | 1 | 22 | C |
| 1.15187461  | -1.96183720 | -0.10151177 | 1 | 23 | C |
| 0.57020040  | -1.97773639 | -0.12239233 | 1 | 24 | C |
| 2.03253089  | 0.51672613  | -0.11014785 | 1 | 25 | C |
| 1.46849996  | 0.52929227  | -0.01977645 | 1 | 26 | C |
| -2.02000000 | 0.50000000  | -0.10000000 | 1 | 27 | C |
| -1.42529582 | 0.49705066  | -0.15597089 | 1 | 28 | C |
| -0.23263695 | 0.52401534  | -0.10301771 | 1 | 29 | C |
| 2.02054622  | 1.52199181  | -0.10131391 | 1 | 30 | C |
| 1.44217630  | 1.52393123  | -0.10177936 | 1 | 31 | C |
| 0.30199553  | 1.50048902  | -0.10291919 | 1 | 32 | C |
| -2.02035640 | 1.51053861  | -0.10022321 | 1 | 33 | C |
| -1.44034026 | 1.49850690  | -0.10058521 | 1 | 34 | C |
| -0.27784986 | 1.50179961  | -0.08655058 | 1 | 35 | C |
| 2.00666672  | -0.47526032 | -0.11594540 | 1 | 36 | C |
| 1.43139458  | -0.47621825 | -0.06419416 | 1 | 37 | C |
| -2.01176525 | -0.49247046 | -0.12348809 | 1 | 38 | C |

|             |             |             |   |     |    |
|-------------|-------------|-------------|---|-----|----|
| -1.42687856 | -0.49058734 | -0.14721882 | 1 | 39  | C  |
| -0.23865027 | -0.53410204 | -0.13809296 | 1 | 40  | C  |
| 2.00070910  | -1.46448001 | -0.11259922 | 1 | 41  | C  |
| 1.41117089  | -1.44282421 | -0.12869334 | 1 | 42  | C  |
| 0.26483740  | -1.48106515 | -0.13846731 | 1 | 43  | C  |
| -2.02341563 | -1.49111463 | -0.12388017 | 1 | 44  | C  |
| -1.44685512 | -1.49708854 | -0.11644584 | 1 | 45  | C  |
| -0.30224629 | -1.51001557 | -0.12155756 | 1 | 46  | C  |
| -2.31317667 | 0.00000226  | 1.14123872  | 3 | 47  | Ru |
| -0.46388942 | -0.00504030 | 1.04084433  | 3 | 48  | Ru |
| 1.14754588  | 0.01296868  | 0.53609412  | 3 | 49  | Ru |
| -2.31219132 | 1.00183666  | 1.02315070  | 3 | 50  | Ru |
| -0.56889940 | 0.97653008  | 1.16500285  | 3 | 51  | Ru |
| 1.07979951  | 0.89352492  | 1.08664023  | 3 | 52  | Ru |
| -2.28941093 | -1.00263818 | 0.99952365  | 3 | 53  | Ru |
| -0.55542533 | -1.00940419 | 1.17115446  | 3 | 54  | Ru |
| 1.08456964  | -0.93654699 | 0.96381676  | 3 | 55  | Ru |
| -2.45275702 | -2.00884724 | 1.23849311  | 3 | 56  | Ru |
| -0.56265691 | -2.02131874 | 0.75240813  | 3 | 57  | Ru |
| 1.08014925  | -1.99465589 | 0.74904003  | 3 | 58  | Ru |
| 1.99204023  | 0.49336884  | 1.08761520  | 3 | 59  | Ru |
| 0.29227912  | 0.51619693  | 0.51101717  | 3 | 60  | Ru |
| -1.42629274 | 0.51692252  | 0.72118394  | 3 | 61  | Ru |
| 1.95471398  | 1.48151969  | 0.87074318  | 3 | 62  | Ru |
| 0.28025041  | 1.47166884  | 1.14485505  | 3 | 63  | Ru |
| -1.45711491 | 1.48814463  | 1.09383731  | 3 | 64  | Ru |
| 2.01826668  | -0.50000070 | 1.04156333  | 3 | 65  | Ru |
| 0.24175161  | -0.53055304 | 0.57579026  | 3 | 66  | Ru |
| -1.38366711 | -0.52023031 | 0.72564056  | 3 | 67  | Ru |
| 2.00132806  | -1.47586444 | 0.76794510  | 3 | 68  | Ru |
| 0.27818195  | -1.54112245 | 1.18008397  | 3 | 69  | Ru |
| -1.43587986 | -1.50715128 | 1.04997317  | 3 | 70  | Ru |
| 2.29652470  | 0.01761106  | 1.97806688  | 3 | 71  | Ru |
| 0.54464570  | 0.04529148  | 1.46139535  | 3 | 72  | Ru |
| -1.23095648 | 0.04015697  | 1.68889975  | 3 | 73  | Ru |
| 2.26673570  | 1.06210255  | 1.92311210  | 3 | 74  | Ru |
| 0.52163267  | 0.95494140  | 2.05664168  | 3 | 75  | Ru |
| -1.17491167 | 1.02006241  | 2.00963562  | 3 | 76  | Ru |
| 2.27496017  | -1.01666911 | 1.87556137  | 3 | 77  | Ru |
| 0.54414455  | -0.94100716 | 1.93864133  | 3 | 78  | Ru |
| -1.16271719 | -0.93486027 | 2.00823419  | 3 | 79  | Ru |
| 2.19584429  | -1.95263742 | 2.26465303  | 3 | 80  | Ru |
| 0.62321782  | -1.97079975 | 2.18786041  | 3 | 81  | Ru |
| -1.14325494 | -1.97618636 | 1.88153791  | 3 | 82  | Ru |
| -2.06123784 | 0.55404628  | 1.98187404  | 3 | 83  | Ru |
| -0.34591174 | 0.50687352  | 2.20188505  | 3 | 84  | Ru |
| 1.37589743  | 0.46438350  | 2.04160582  | 3 | 85  | Ru |
| -2.05827767 | 1.55847805  | 2.14313542  | 3 | 86  | Ru |
| -0.28390391 | 1.54485373  | 1.97643796  | 3 | 87  | Ru |
| 1.39855642  | 1.50760825  | 1.82783297  | 3 | 88  | Ru |
| -2.01531407 | -0.45200052 | 2.10424649  | 3 | 89  | Ru |
| -0.28864974 | -0.43421508 | 2.02412618  | 3 | 90  | Ru |
| 1.38800975  | -0.47148821 | 1.91791710  | 3 | 91  | Ru |
| -2.03945140 | -1.46773593 | 1.95398903  | 3 | 92  | Ru |
| -0.29973638 | -1.50173841 | 2.11641338  | 3 | 93  | Ru |
| 1.42085023  | -1.52235132 | 1.70803010  | 3 | 94  | Ru |
| -2.31756492 | -0.05292194 | 3.06318677  | 3 | 95  | Ru |
| -0.59623916 | -0.00947128 | 3.11966751  | 3 | 96  | Ru |
| 1.20833775  | -0.02604212 | 3.40124171  | 3 | 97  | Ru |
| -2.33128597 | 0.97115643  | 2.94580319  | 3 | 98  | Ru |
| -0.59887564 | 0.99856666  | 3.14716943  | 3 | 99  | Ru |
| 1.15912427  | 1.06441818  | 2.84934697  | 3 | 100 | Ru |

|             |             |            |   |     |    |
|-------------|-------------|------------|---|-----|----|
| -2.34960137 | -1.03442084 | 2.86515109 | 3 | 101 | Ru |
| -0.59332874 | -0.96620427 | 2.91565272 | 3 | 102 | Ru |
| 1.17756165  | -1.10473382 | 2.74312732 | 3 | 103 | Ru |
| -2.32974538 | -2.00968861 | 3.06613135 | 3 | 104 | Ru |
| -0.65907531 | -1.93801692 | 3.33734132 | 3 | 105 | Ru |
| 1.10967201  | -1.99445727 | 3.24423033 | 3 | 106 | Ru |
| 1.99157407  | 0.49644850  | 2.88230129 | 3 | 107 | Ru |
| 0.35185446  | 0.46299164  | 3.01937699 | 3 | 108 | Ru |
| -1.44180352 | 0.40162394  | 2.80238243 | 3 | 109 | Ru |
| 1.97974078  | 1.50546152  | 3.18681378 | 3 | 110 | Ru |
| 0.20782328  | 1.50348568  | 2.94075596 | 3 | 111 | Ru |
| -1.41626341 | 1.47875814  | 2.94873592 | 3 | 112 | Ru |
| 1.97192124  | -0.50250947 | 2.80821737 | 3 | 113 | Ru |
| 0.37654132  | -0.47302494 | 2.87492826 | 3 | 114 | Ru |
| -1.46201314 | -0.60144553 | 3.24943642 | 3 | 115 | Ru |
| 1.99739832  | -1.42130039 | 3.27016369 | 3 | 116 | Ru |
| 0.23049099  | -1.50905219 | 3.03376850 | 3 | 117 | Ru |
| -1.42932716 | -1.52970141 | 2.81285963 | 3 | 118 | Ru |
| 2.17441574  | -0.04947305 | 3.81841804 | 3 | 119 | Ru |
| 0.57526896  | -0.02080438 | 4.22795866 | 3 | 120 | Ru |
| -1.12371103 | -0.01470078 | 4.08627198 | 3 | 121 | Ru |
| 2.33903793  | 0.94861540  | 3.96335799 | 3 | 122 | Ru |
| 0.68764345  | 0.97383741  | 3.84334767 | 3 | 123 | Ru |
| -1.12702400 | 0.98669382  | 4.07123116 | 3 | 124 | Ru |
| 2.33885271  | -1.00293296 | 4.18256434 | 3 | 125 | Ru |
| 0.75237748  | -0.94830353 | 3.76502730 | 3 | 126 | Ru |
| -1.10455732 | -0.97732987 | 4.21014230 | 3 | 127 | Ru |
| 2.38119876  | -1.99540964 | 4.01615818 | 3 | 128 | Ru |
| 0.58894576  | -1.99315095 | 4.10695231 | 3 | 129 | Ru |
| -1.15821530 | -2.01348212 | 4.30810747 | 3 | 130 | Ru |
| -1.97736321 | 0.48171436  | 3.83512006 | 3 | 131 | Ru |
| -0.23616848 | 0.47046349  | 3.95462239 | 3 | 132 | Ru |
| 1.46918793  | 0.50702823  | 4.34116090 | 3 | 133 | Ru |
| -1.96590160 | 1.50270013  | 3.88934148 | 3 | 134 | Ru |
| -0.24840400 | 1.47431105  | 4.08558108 | 3 | 135 | Ru |
| 1.49258541  | 1.49725365  | 4.16627756 | 3 | 136 | Ru |
| -2.06731600 | -0.47282916 | 4.08582061 | 3 | 137 | Ru |
| -0.21388245 | -0.57253628 | 3.84723484 | 3 | 138 | Ru |
| 1.45000508  | -0.51105673 | 4.39710558 | 3 | 139 | Ru |
| -1.89145389 | -1.45970446 | 3.81224176 | 3 | 140 | Ru |
| -0.23990055 | -1.49153810 | 4.18163883 | 3 | 141 | Ru |
| 1.47418180  | -1.51436870 | 4.21627896 | 3 | 142 | Ru |

4)

|             |             |             |   |    |   |
|-------------|-------------|-------------|---|----|---|
| -0.46033146 | -0.02755665 | -1.30053189 | 2 | 1  | O |
| -0.45996990 | -0.03153465 | -1.75001366 | 1 | 2  | C |
| -2.30917396 | 0.00329742  | -0.20416386 | 1 | 3  | C |
| -1.09716924 | -0.00525672 | -0.22218906 | 1 | 4  | C |
| -0.48922900 | -0.01068521 | -0.23419270 | 1 | 5  | C |
| 2.31839602  | 0.01402586  | -0.19639606 | 1 | 6  | C |
| -2.30408855 | 1.01194074  | -0.21274089 | 1 | 7  | C |
| -1.13944804 | 0.99928435  | -0.22020373 | 1 | 8  | C |
| -0.55606608 | 0.99567301  | -0.22631044 | 1 | 9  | C |
| 2.31980187  | 1.02086633  | -0.22176833 | 1 | 10 | C |
| 1.16000000  | 1.00000000  | -0.20000000 | 1 | 11 | C |
| 0.58000000  | 1.00000000  | -0.20000000 | 1 | 12 | C |
| -2.30658266 | -0.98766222 | -0.20423963 | 1 | 13 | C |
| -1.14141970 | -0.99754591 | -0.20006621 | 1 | 14 | C |
| -0.56364334 | -1.00227923 | -0.21954361 | 1 | 15 | C |
| 2.30981785  | -0.97186665 | -0.20340542 | 1 | 16 | C |
| 1.08795963  | -0.93014619 | -0.22513443 | 1 | 17 | C |
| 0.46477617  | -0.94074343 | -0.20611795 | 1 | 18 | C |

|             |             |             |   |    |    |
|-------------|-------------|-------------|---|----|----|
| -2.31517378 | -1.98366890 | -0.20029760 | 1 | 19 | C  |
| -1.15620943 | -2.00256129 | -0.20142369 | 1 | 20 | C  |
| -0.57770607 | -2.01248847 | -0.20274299 | 1 | 21 | C  |
| 2.30556492  | -1.97423484 | -0.18264264 | 1 | 22 | C  |
| 1.15187461  | -1.96183720 | -0.20151177 | 1 | 23 | C  |
| 0.57164946  | -1.97854385 | -0.21408237 | 1 | 24 | C  |
| 2.03455126  | 0.51876615  | -0.19441001 | 1 | 25 | C  |
| 1.47001987  | 0.51735920  | -0.10006385 | 1 | 26 | C  |
| -2.02000000 | 0.50000000  | -0.20000000 | 1 | 27 | C  |
| -1.42028670 | 0.49263917  | -0.22085887 | 1 | 28 | C  |
| -0.23263695 | 0.52401534  | -0.20301771 | 1 | 29 | C  |
| 2.02054622  | 1.52199181  | -0.20131391 | 1 | 30 | C  |
| 1.44217630  | 1.52393123  | -0.20177936 | 1 | 31 | C  |
| 0.30199553  | 1.50048902  | -0.20291919 | 1 | 32 | C  |
| -2.02035640 | 1.51053861  | -0.20022321 | 1 | 33 | C  |
| -1.44034026 | 1.49850690  | -0.20058521 | 1 | 34 | C  |
| -0.27852899 | 1.49881885  | -0.19014494 | 1 | 35 | C  |
| 2.00748604  | -0.47653008 | -0.19685861 | 1 | 36 | C  |
| 1.42792039  | -0.47307163 | -0.14144286 | 1 | 37 | C  |
| -2.00715964 | -0.49036218 | -0.19893604 | 1 | 38 | C  |
| -1.42034735 | -0.49210755 | -0.21178231 | 1 | 39 | C  |
| -0.21012437 | -0.54582063 | -0.22676959 | 1 | 40 | C  |
| 2.00355489  | -1.46421599 | -0.17586757 | 1 | 41 | C  |
| 1.40913349  | -1.44090059 | -0.21214575 | 1 | 42 | C  |
| 0.26756998  | -1.48374872 | -0.22475424 | 1 | 43 | C  |
| -2.01906101 | -1.49097597 | -0.21083168 | 1 | 44 | C  |
| -1.44106636 | -1.49829920 | -0.20452454 | 1 | 45 | C  |
| -0.30103442 | -1.51187583 | -0.21125934 | 1 | 46 | C  |
| -2.31317667 | 0.00000226  | 1.14123872  | 3 | 47 | Ru |
| -0.42903667 | -0.00082662 | 1.02284431  | 3 | 48 | Ru |
| 1.16110678  | 0.00774556  | 0.44865672  | 3 | 49 | Ru |
| -2.30415885 | 1.00511134  | 1.04928298  | 3 | 50 | Ru |
| -0.57832671 | 0.96173397  | 1.11140668  | 3 | 51 | Ru |
| 1.06422191  | 0.87089222  | 1.06237790  | 3 | 52 | Ru |
| -2.28603896 | -1.00587888 | 0.99630231  | 3 | 53 | Ru |
| -0.55546511 | -0.99282286 | 1.15506765  | 3 | 54 | Ru |
| 1.07701657  | -0.89418044 | 0.97888231  | 3 | 55 | Ru |
| -2.47916061 | -1.99733241 | 1.23411350  | 3 | 56 | Ru |
| -0.57207649 | -2.01794466 | 0.73558924  | 3 | 57 | Ru |
| 1.08434045  | -1.98629393 | 0.65786995  | 3 | 58 | Ru |
| 1.98902369  | 0.49447586  | 1.08298451  | 3 | 59 | Ru |
| 0.29040303  | 0.51896826  | 0.42333456  | 3 | 60 | Ru |
| -1.45615809 | 0.53609348  | 0.66653072  | 3 | 61 | Ru |
| 1.96296112  | 1.48312645  | 0.82403602  | 3 | 62 | Ru |
| 0.29586969  | 1.47581988  | 1.07180261  | 3 | 63 | Ru |
| -1.45699373 | 1.49911692  | 1.10508731  | 3 | 64 | Ru |
| 2.01826668  | -0.50000070 | 1.04156333  | 3 | 65 | Ru |
| 0.23972474  | -0.56740925 | 0.52446465  | 3 | 66 | Ru |
| -1.39194345 | -0.52347225 | 0.66697318  | 3 | 67 | Ru |
| 2.00202527  | -1.47021638 | 0.72387736  | 3 | 68 | Ru |
| 0.29304723  | -1.53312950 | 1.14625982  | 3 | 69 | Ru |
| -1.43129232 | -1.49348623 | 1.08747506  | 3 | 70 | Ru |
| 2.29172008  | 0.01492094  | 1.98541974  | 3 | 71 | Ru |
| 0.56006059  | 0.02725548  | 1.38194779  | 3 | 72 | Ru |
| -1.26300197 | 0.03085785  | 1.60574526  | 3 | 73 | Ru |
| 2.25057159  | 1.05680946  | 1.93956341  | 3 | 74 | Ru |
| 0.51512050  | 0.94762420  | 2.03468664  | 3 | 75 | Ru |
| -1.17175460 | 1.01069167  | 1.99347171  | 3 | 76 | Ru |
| 2.27494190  | -1.01451352 | 1.87740500  | 3 | 77 | Ru |
| 0.54260679  | -0.94689714 | 1.94379836  | 3 | 78 | Ru |
| -1.16305006 | -0.93160586 | 2.01498419  | 3 | 79 | Ru |
| 2.18064973  | -1.95812281 | 2.25669450  | 3 | 80 | Ru |

|             |             |            |   |     |    |
|-------------|-------------|------------|---|-----|----|
| 0.62478027  | -1.98342763 | 2.15670656 | 3 | 81  | Ru |
| -1.14288234 | -1.98227216 | 1.94037125 | 3 | 82  | Ru |
| -2.06140150 | 0.54962130  | 1.98761707 | 3 | 83  | Ru |
| -0.35220088 | 0.50386049  | 2.20016033 | 3 | 84  | Ru |
| 1.37093373  | 0.46382873  | 2.01397276 | 3 | 85  | Ru |
| -2.06391873 | 1.55100576  | 2.13109633 | 3 | 86  | Ru |
| -0.28010172 | 1.53934760  | 1.88681516 | 3 | 87  | Ru |
| 1.39355287  | 1.51485140  | 1.76196961 | 3 | 88  | Ru |
| -2.00811211 | -0.45173519 | 2.11043453 | 3 | 89  | Ru |
| -0.28583741 | -0.41441230 | 2.00997114 | 3 | 90  | Ru |
| 1.38632376  | -0.46691463 | 1.92879014 | 3 | 91  | Ru |
| -2.04266163 | -1.47052685 | 1.97248709 | 3 | 92  | Ru |
| -0.30017657 | -1.50843078 | 2.06786965 | 3 | 93  | Ru |
| 1.41655585  | -1.52446863 | 1.68477372 | 3 | 94  | Ru |
| -2.32470104 | -0.04806991 | 3.07070457 | 3 | 95  | Ru |
| -0.59052934 | -0.00487432 | 3.12547231 | 3 | 96  | Ru |
| 1.19654452  | -0.01639428 | 3.41765341 | 3 | 97  | Ru |
| -2.33421926 | 0.97398323  | 2.94350490 | 3 | 98  | Ru |
| -0.59481319 | 1.00172861  | 3.15434456 | 3 | 99  | Ru |
| 1.15542885  | 1.07851784  | 2.81999611 | 3 | 100 | Ru |
| -2.35969753 | -1.02940987 | 2.87120172 | 3 | 101 | Ru |
| -0.58813967 | -0.96628452 | 2.89478920 | 3 | 102 | Ru |
| 1.17932600  | -1.11123293 | 2.74275414 | 3 | 103 | Ru |
| -2.33509415 | -2.01227402 | 3.05980608 | 3 | 104 | Ru |
| -0.65810916 | -1.92164399 | 3.36649684 | 3 | 105 | Ru |
| 1.10554024  | -1.99571496 | 3.23118375 | 3 | 106 | Ru |
| 1.97634151  | 0.49411288  | 2.87656594 | 3 | 107 | Ru |
| 0.35836851  | 0.46678962  | 2.99513565 | 3 | 108 | Ru |
| -1.44053612 | 0.40402743  | 2.80980346 | 3 | 109 | Ru |
| 1.97554204  | 1.50040316  | 3.19334509 | 3 | 110 | Ru |
| 0.19085699  | 1.50675456  | 2.91889333 | 3 | 111 | Ru |
| -1.41361869 | 1.48521098  | 2.93107069 | 3 | 112 | Ru |
| 1.96028277  | -0.50142125 | 2.81738306 | 3 | 113 | Ru |
| 0.38019303  | -0.46813914 | 2.87914361 | 3 | 114 | Ru |
| -1.46698892 | -0.58449196 | 3.23788869 | 3 | 115 | Ru |
| 1.99245181  | -1.42678939 | 3.26875797 | 3 | 116 | Ru |
| 0.22637938  | -1.50516368 | 3.00202127 | 3 | 117 | Ru |
| -1.43773312 | -1.51710618 | 2.83191556 | 3 | 118 | Ru |
| 2.16700318  | -0.04829666 | 3.81956609 | 3 | 119 | Ru |
| 0.57815637  | -0.02331395 | 4.24783918 | 3 | 120 | Ru |
| -1.11575587 | -0.02237333 | 4.09261128 | 3 | 121 | Ru |
| 2.33863887  | 0.94925403  | 3.96481291 | 3 | 122 | Ru |
| 0.69815790  | 0.96101976  | 3.83293345 | 3 | 123 | Ru |
| -1.12573390 | 0.97780053  | 4.07236781 | 3 | 124 | Ru |
| 2.33575392  | -0.99874996 | 4.17507044 | 3 | 125 | Ru |
| 0.75851538  | -0.95190833 | 3.77172469 | 3 | 126 | Ru |
| -1.09397344 | -1.00234621 | 4.15832180 | 3 | 127 | Ru |
| 2.37657115  | -2.00117357 | 4.01851735 | 3 | 128 | Ru |
| 0.58526434  | -2.00025393 | 4.07527514 | 3 | 129 | Ru |
| -1.16145509 | -2.02204344 | 4.34089078 | 3 | 130 | Ru |
| -1.97801862 | 0.47991684  | 3.84981645 | 3 | 131 | Ru |
| -0.22972988 | 0.46621169  | 3.95926674 | 3 | 132 | Ru |
| 1.47584935  | 0.50552125  | 4.36249992 | 3 | 133 | Ru |
| -1.95915617 | 1.49978702  | 3.88503239 | 3 | 134 | Ru |
| -0.24648446 | 1.47435001  | 4.09863842 | 3 | 135 | Ru |
| 1.49103750  | 1.49116865  | 4.18057613 | 3 | 136 | Ru |
| -2.06315203 | -0.47832924 | 4.08253762 | 3 | 137 | Ru |
| -0.20189235 | -0.58504697 | 3.84731138 | 3 | 138 | Ru |
| 1.45215542  | -0.51575005 | 4.41589640 | 3 | 139 | Ru |
| -1.90609584 | -1.46658520 | 3.81960767 | 3 | 140 | Ru |
| -0.22572430 | -1.49155987 | 4.23696926 | 3 | 141 | Ru |
| 1.47268787  | -1.51790438 | 4.22549440 | 3 | 142 | Ru |

5)

|             |             |             |   |    |    |
|-------------|-------------|-------------|---|----|----|
| -0.46237873 | -0.00788402 | -1.44671527 | 2 | 1  | O  |
| -0.46385228 | -0.03565298 | -1.84247641 | 1 | 2  | C  |
| -2.29064384 | 0.00393141  | -0.28863143 | 1 | 3  | C  |
| -1.07929940 | 0.00120456  | -0.30180332 | 1 | 4  | C  |
| -0.47892600 | -0.00632382 | -0.32744704 | 1 | 5  | C  |
| 2.31253238  | 0.00895599  | -0.27340243 | 1 | 6  | C  |
| -2.30868683 | 1.00796512  | -0.31574522 | 1 | 7  | C  |
| -1.13763423 | 1.00652887  | -0.31121233 | 1 | 8  | C  |
| -0.54998909 | 0.99710673  | -0.32236660 | 1 | 9  | C  |
| 2.31980163  | 1.02287482  | -0.31622508 | 1 | 10 | C  |
| 1.16000000  | 1.00000000  | -0.30000000 | 1 | 11 | C  |
| 0.58000000  | 1.00000000  | -0.30000000 | 1 | 12 | C  |
| -2.30086646 | -0.98348197 | -0.29906552 | 1 | 13 | C  |
| -1.13029064 | -0.99653421 | -0.28191588 | 1 | 14 | C  |
| -0.54919790 | -1.00351399 | -0.31076524 | 1 | 15 | C  |
| 2.32585567  | -0.97820938 | -0.29772218 | 1 | 16 | C  |
| 1.09818737  | -0.91269197 | -0.31529242 | 1 | 17 | C  |
| 0.46477617  | -0.94074343 | -0.30611795 | 1 | 18 | C  |
| -2.31517378 | -1.98366890 | -0.30029760 | 1 | 19 | C  |
| -1.15620943 | -2.00256129 | -0.30142369 | 1 | 20 | C  |
| -0.57770607 | -2.01248847 | -0.30274299 | 1 | 21 | C  |
| 2.30685732  | -1.96444118 | -0.28464920 | 1 | 22 | C  |
| 1.15187461  | -1.96183720 | -0.30151177 | 1 | 23 | C  |
| 0.58160785  | -1.98573577 | -0.31791355 | 1 | 24 | C  |
| 2.03696929  | 0.52051657  | -0.27758976 | 1 | 25 | C  |
| 1.46409956  | 0.52255339  | -0.17950707 | 1 | 26 | C  |
| -2.02000000 | 0.50000000  | -0.30000000 | 1 | 27 | C  |
| -1.42990692 | 0.48919729  | -0.29630721 | 1 | 28 | C  |
| -0.23263695 | 0.52401534  | -0.30301771 | 1 | 29 | C  |
| 2.02054622  | 1.52199181  | -0.30131391 | 1 | 30 | C  |
| 1.44217630  | 1.52393123  | -0.30177936 | 1 | 31 | C  |
| 0.30199553  | 1.50048902  | -0.30291919 | 1 | 32 | C  |
| -2.02035640 | 1.51053861  | -0.30022321 | 1 | 33 | C  |
| -1.44034026 | 1.49850690  | -0.30058521 | 1 | 34 | C  |
| -0.28250467 | 1.49889989  | -0.29806562 | 1 | 35 | C  |
| 2.00300922  | -0.46933261 | -0.27716293 | 1 | 36 | C  |
| 1.41875400  | -0.49263462 | -0.21974171 | 1 | 37 | C  |
| -2.02981574 | -0.48640035 | -0.27750973 | 1 | 38 | C  |
| -1.41541330 | -0.50652112 | -0.28553474 | 1 | 39 | C  |
| -0.19906232 | -0.55758453 | -0.31519270 | 1 | 40 | C  |
| 1.98834126  | -1.46304693 | -0.27578847 | 1 | 41 | C  |
| 1.41814201  | -1.45165448 | -0.31194888 | 1 | 42 | C  |
| 0.25718643  | -1.48178818 | -0.32610805 | 1 | 43 | C  |
| -2.01896250 | -1.49365680 | -0.30687232 | 1 | 44 | C  |
| -1.45289644 | -1.49518129 | -0.29775311 | 1 | 45 | C  |
| -0.30656248 | -1.52162472 | -0.31618683 | 1 | 46 | C  |
| -2.31317667 | 0.00000226  | 1.14123872  | 3 | 47 | Ru |
| -0.41913553 | -0.00362158 | 0.95903964  | 3 | 48 | Ru |
| 1.15723814  | 0.01793318  | 0.37443454  | 3 | 49 | Ru |
| -2.30831290 | 1.01077828  | 1.02421257  | 3 | 50 | Ru |
| -0.60121371 | 0.94011677  | 1.05885488  | 3 | 51 | Ru |
| 1.04452267  | 0.84743884  | 1.02336234  | 3 | 52 | Ru |
| -2.29493683 | -1.01393681 | 0.98708183  | 3 | 53 | Ru |
| -0.56675560 | -0.98106595 | 1.11005234  | 3 | 54 | Ru |
| 1.07562746  | -0.87557606 | 0.95048234  | 3 | 55 | Ru |
| -2.53025192 | -2.00730396 | 1.22527357  | 3 | 56 | Ru |
| -0.58348703 | -2.01720041 | 0.76488494  | 3 | 57 | Ru |
| 1.10126239  | -1.98422125 | 0.64338844  | 3 | 58 | Ru |
| 1.98526558  | 0.50418456  | 1.09408039  | 3 | 59 | Ru |
| 0.28813205  | 0.52239125  | 0.33598549  | 3 | 60 | Ru |



|             |             |            |   |     |    |
|-------------|-------------|------------|---|-----|----|
| -1.49108582 | 0.55577450  | 0.59805198 | 3 | 61  | Ru |
| 1.97135362  | 1.45792633  | 0.72078809 | 3 | 62  | Ru |
| 0.28759303  | 1.47050466  | 0.99163737 | 3 | 63  | Ru |
| -1.47513705 | 1.50918346  | 1.09846751 | 3 | 64  | Ru |
| 2.01826668  | -0.50000070 | 1.04156333 | 3 | 65  | Ru |
| 0.24391392  | -0.57455344 | 0.44653948 | 3 | 66  | Ru |
| -1.42683308 | -0.52817215 | 0.59731845 | 3 | 67  | Ru |
| 1.99709091  | -1.46060700 | 0.67679145 | 3 | 68  | Ru |
| 0.29460905  | -1.52799483 | 1.10568171 | 3 | 69  | Ru |
| -1.43754508 | -1.48721769 | 1.08141642 | 3 | 70  | Ru |
| 2.29926613  | 0.01529120  | 2.02507552 | 3 | 71  | Ru |
| 0.56116596  | 0.01626019  | 1.31547140 | 3 | 72  | Ru |
| -1.28279020 | 0.02484353  | 1.52361530 | 3 | 73  | Ru |
| 2.24115620  | 1.05411837  | 1.97075353 | 3 | 74  | Ru |
| 0.50347391  | 0.93537960  | 2.01094727 | 3 | 75  | Ru |
| -1.17368583 | 1.00747914  | 1.96678977 | 3 | 76  | Ru |
| 2.27085248  | -1.00493917 | 1.88187997 | 3 | 77  | Ru |
| 0.54346549  | -0.95313124 | 1.93113541 | 3 | 78  | Ru |
| -1.16236532 | -0.92795905 | 1.97816030 | 3 | 79  | Ru |
| 2.15596054  | -1.95233448 | 2.25923555 | 3 | 80  | Ru |
| 0.63762537  | -2.00165889 | 2.13417594 | 3 | 81  | Ru |
| -1.13943051 | -1.98583886 | 1.96537148 | 3 | 82  | Ru |
| -2.06522604 | 0.55459766  | 1.95927475 | 3 | 83  | Ru |
| -0.37571524 | 0.50461870  | 2.21463094 | 3 | 84  | Ru |
| 1.35850574  | 0.47085355  | 1.99594943 | 3 | 85  | Ru |
| -2.07689649 | 1.55122760  | 2.12434553 | 3 | 86  | Ru |
| -0.27774692 | 1.52962862  | 1.82080864 | 3 | 87  | Ru |
| 1.40740230  | 1.51489728  | 1.67407417 | 3 | 88  | Ru |
| -1.98454977 | -0.43056898 | 2.12733027 | 3 | 89  | Ru |
| -0.28202959 | -0.39577584 | 1.96302352 | 3 | 90  | Ru |
| 1.38130981  | -0.46850457 | 1.90963620 | 3 | 91  | Ru |
| -2.05052386 | -1.46547024 | 1.95997440 | 3 | 92  | Ru |
| -0.29099349 | -1.50868727 | 2.00966017 | 3 | 93  | Ru |
| 1.41899282  | -1.51878099 | 1.64252717 | 3 | 94  | Ru |
| -2.33304220 | -0.05990941 | 3.06784735 | 3 | 95  | Ru |
| -0.59081766 | -0.00436895 | 3.14804294 | 3 | 96  | Ru |
| 1.18119112  | -0.00476443 | 3.43816187 | 3 | 97  | Ru |
| -2.33440617 | 0.96713176  | 2.94224448 | 3 | 98  | Ru |
| -0.61942447 | 1.00092407  | 3.19950266 | 3 | 99  | Ru |
| 1.13828446  | 1.11420554  | 2.79371969 | 3 | 100 | Ru |
| -2.37295279 | -1.03765877 | 2.86867363 | 3 | 101 | Ru |
| -0.59026241 | -0.94530386 | 2.85149246 | 3 | 102 | Ru |
| 1.17964915  | -1.15072083 | 2.72192246 | 3 | 103 | Ru |
| -2.33855949 | -2.01447287 | 3.06511631 | 3 | 104 | Ru |
| -0.66650692 | -1.90059088 | 3.36122883 | 3 | 105 | Ru |
| 1.05809071  | -2.00008999 | 3.30480053 | 3 | 106 | Ru |
| 1.95394174  | 0.50427169  | 2.88882249 | 3 | 107 | Ru |
| 0.35623648  | 0.47626439  | 2.98516957 | 3 | 108 | Ru |
| -1.44205547 | 0.39198623  | 2.79711745 | 3 | 109 | Ru |
| 1.95472306  | 1.51092651  | 3.19511142 | 3 | 110 | Ru |
| 0.16389750  | 1.51147991  | 2.90685776 | 3 | 111 | Ru |
| -1.41009480 | 1.48471376  | 2.91269615 | 3 | 112 | Ru |
| 1.92714025  | -0.50242121 | 2.82953106 | 3 | 113 | Ru |
| 0.39631860  | -0.46419920 | 2.86327554 | 3 | 114 | Ru |
| -1.46470361 | -0.58966696 | 3.25824468 | 3 | 115 | Ru |
| 1.97891062  | -1.43223117 | 3.27531814 | 3 | 116 | Ru |
| 0.21966875  | -1.49834216 | 2.96719033 | 3 | 117 | Ru |
| -1.44636713 | -1.50486751 | 2.81735516 | 3 | 118 | Ru |
| 2.15474480  | -0.05757995 | 3.81507461 | 3 | 119 | Ru |
| 0.58362475  | -0.03165703 | 4.27020473 | 3 | 120 | Ru |
| -1.09617355 | -0.02977074 | 4.11196897 | 3 | 121 | Ru |
| 2.35356360  | 0.94057077  | 3.93691322 | 3 | 122 | Ru |

|             |             |            |   |     |    |
|-------------|-------------|------------|---|-----|----|
| 0.72288042  | 0.97302107  | 3.81885109 | 3 | 123 | Ru |
| -1.11325589 | 0.97200317  | 4.15363975 | 3 | 124 | Ru |
| 2.35320339  | -1.00381168 | 4.16064583 | 3 | 125 | Ru |
| 0.78451031  | -0.97354011 | 3.75473182 | 3 | 126 | Ru |
| -1.08859549 | -0.99661093 | 4.20337251 | 3 | 127 | Ru |
| 2.39010944  | -2.00913268 | 4.01888429 | 3 | 128 | Ru |
| 0.60067605  | -2.01772070 | 4.20409657 | 3 | 129 | Ru |
| -1.14689874 | -2.02111153 | 4.35026918 | 3 | 130 | Ru |
| -1.94572486 | 0.47459783  | 3.83075726 | 3 | 131 | Ru |
| -0.21518748 | 0.46000580  | 3.98982204 | 3 | 132 | Ru |
| 1.48712330  | 0.50296370  | 4.37488486 | 3 | 133 | Ru |
| -1.93066833 | 1.49678524  | 3.87792110 | 3 | 134 | Ru |
| -0.23758526 | 1.47600999  | 4.06917552 | 3 | 135 | Ru |
| 1.51517115  | 1.48729456  | 4.22284156 | 3 | 136 | Ru |
| -2.05632945 | -0.46423413 | 4.11761819 | 3 | 137 | Ru |
| -0.17779530 | -0.60487790 | 3.83406608 | 3 | 138 | Ru |
| 1.46054064  | -0.52228737 | 4.43429556 | 3 | 139 | Ru |
| -1.88759303 | -1.45955299 | 3.81697326 | 3 | 140 | Ru |
| -0.22147632 | -1.49774933 | 4.23328695 | 3 | 141 | Ru |
| 1.49057270  | -1.51531925 | 4.25924333 | 3 | 142 | Ru |

Pure graphene

Adsorption 2vacancy

|             |             |             |   |    |   |
|-------------|-------------|-------------|---|----|---|
| -0.60221210 | 0.00000219  | -1.06137107 | 2 | 1  | O |
| -0.61366003 | 0.00001315  | -1.52422274 | 1 | 2  | C |
| -2.29621243 | 0.00000725  | 0.02453940  | 1 | 3  | C |
| -1.17685451 | 0.00000785  | 0.02038336  | 1 | 4  | C |
| -0.61860047 | 0.00000959  | 0.04622199  | 1 | 5  | C |
| 2.34531813  | 0.00001015  | 0.05494882  | 1 | 6  | C |
| -2.31755574 | 1.00252438  | 0.02632000  | 1 | 7  | C |
| -1.15510812 | 1.00241530  | 0.01898739  | 1 | 8  | C |
| -0.57622120 | 0.99396045  | 0.03425976  | 1 | 9  | C |
| 2.30374575  | 0.99445350  | 0.04953048  | 1 | 10 | C |
| 1.15592785  | 0.90820136  | 0.07801648  | 1 | 11 | C |
| 0.57090371  | 0.90732838  | 0.06962142  | 1 | 12 | C |
| -2.31755959 | -1.00250791 | 0.02632921  | 1 | 13 | C |
| -1.15511030 | -1.00239936 | 0.01899638  | 1 | 14 | C |
| -0.57622614 | -0.99394418 | 0.03426183  | 1 | 15 | C |
| 2.30374444  | -0.99443678 | 0.04953108  | 1 | 16 | C |
| 1.15592750  | -0.90818487 | 0.07800903  | 1 | 17 | C |
| 0.57090278  | -0.90731079 | 0.06961568  | 1 | 18 | C |
| -2.32624148 | -1.99999318 | 0.02617439  | 1 | 19 | C |
| -1.14632926 | -1.99999010 | 0.01823890  | 1 | 20 | C |
| -0.56576680 | -1.99998298 | 0.02871239  | 1 | 21 | C |
| 2.29324247  | -1.99999033 | 0.04210474  | 1 | 22 | C |
| 1.14934678  | -1.99999281 | 0.06977959  | 1 | 23 | C |
| 0.57734338  | -1.99999206 | 0.06245111  | 1 | 24 | C |
| 2.03120773  | 0.48105521  | 0.06644703  | 1 | 25 | C |
| 1.47009392  | 0.39500817  | 0.08149196  | 1 | 26 | C |
| 0.25704597  | 0.39309451  | 0.06446336  | 1 | 27 | C |
| -2.02058243 | 0.50815977  | 0.01528317  | 1 | 28 | C |
| -1.45231471 | 0.50803443  | 0.01274561  | 1 | 29 | C |
| -0.30407814 | 0.48035282  | 0.04899119  | 1 | 30 | C |
| 2.00606744  | 1.48880975  | 0.05513557  | 1 | 31 | C |
| 1.42829678  | 1.46173693  | 0.07046375  | 1 | 32 | C |
| 0.29867766  | 1.46112896  | 0.05758251  | 1 | 33 | C |
| -2.02720400 | 1.50218903  | 0.01993249  | 1 | 34 | C |
| -1.44533242 | 1.50213830  | 0.01602831  | 1 | 35 | C |
| -0.27884910 | 1.48850801  | 0.03905216  | 1 | 36 | C |
| 2.03120699  | -0.48103897 | 0.06644533  | 1 | 37 | C |
| 1.47009300  | -0.39498959 | 0.08148864  | 1 | 38 | C |
| 0.25704581  | -0.39307366 | 0.06446178  | 1 | 39 | C |

|             |             |            |   |    |   |
|-------------|-------------|------------|---|----|---|
| -2.02058317 | -0.50814563 | 0.01528836 | 1 | 40 | C |
| -1.45231435 | -0.50801523 | 0.01275097 | 1 | 41 | C |
| -0.30407814 | -0.48033583 | 0.04899223 | 1 | 42 | C |
| 2.00606665  | -1.48879296 | 0.05513323 | 1 | 43 | C |
| 1.42829653  | -1.46172114 | 0.07045769 | 1 | 44 | C |
| 0.29867808  | -1.46111268 | 0.05757666 | 1 | 45 | C |
| -2.02720478 | -1.50217473 | 0.01994331 | 1 | 46 | C |
| -1.44533286 | -1.50212230 | 0.01603969 | 1 | 47 | C |
| -0.27884862 | -1.48848876 | 0.03904917 | 1 | 48 | C |

Adsorption 4vacancy

|             |             |             |   |    |   |
|-------------|-------------|-------------|---|----|---|
| -0.46368677 | -0.02829881 | -1.07420958 | 2 | 1  | O |
| -0.46017981 | -0.03085702 | -1.53707818 | 1 | 2  | C |
| -2.27836067 | 0.01128070  | 0.02841500  | 1 | 3  | C |
| -1.04354599 | 0.00942477  | 0.01766406  | 1 | 4  | C |
| -0.38603721 | 0.00902909  | 0.02181529  | 1 | 5  | C |
| 2.34347188  | 0.01107476  | 0.03801895  | 1 | 6  | C |
| -2.30544418 | 0.99729874  | 0.00986999  | 1 | 7  | C |
| -1.11744717 | 1.00423342  | -0.00078486 | 1 | 8  | C |
| -0.53317565 | 1.00419689  | -0.00065764 | 1 | 9  | C |
| 2.29935941  | 0.99099572  | 0.01765140  | 1 | 10 | C |
| 1.07147751  | 0.86973708  | 0.01981652  | 1 | 11 | C |
| 0.46604833  | 0.92894842  | 0.01217006  | 1 | 12 | C |
| -2.30600633 | -0.97465693 | 0.02096914  | 1 | 13 | C |
| -1.11772711 | -0.98465434 | 0.01385213  | 1 | 14 | C |
| -0.53364611 | -0.98568699 | 0.01375997  | 1 | 15 | C |
| 2.29794948  | -0.96856511 | 0.02722618  | 1 | 16 | C |
| 1.06926700  | -0.84474056 | 0.02647085  | 1 | 17 | C |
| 0.46339317  | -0.90649540 | 0.02111076  | 1 | 18 | C |
| -2.32862722 | -1.98864066 | 0.00446000  | 1 | 19 | C |
| -1.16055553 | -1.98961967 | -0.00266459 | 1 | 20 | C |
| -0.58181604 | -1.99044025 | -0.00280645 | 1 | 21 | C |
| 2.27468950  | -1.98853965 | 0.00932870  | 1 | 22 | C |
| 1.13979645  | -1.98917653 | 0.01444204  | 1 | 23 | C |
| 0.56698463  | -1.98942187 | 0.00856912  | 1 | 24 | C |
| 2.01340218  | 0.48388930  | 0.03158603  | 1 | 25 | C |
| 1.43127345  | 0.35974048  | 0.02996135  | 1 | 26 | C |
| -1.98180445 | 0.50590278  | 0.01499221  | 1 | 27 | C |
| -1.38261298 | 0.49604947  | 0.00995945  | 1 | 28 | C |
| -0.13453702 | 0.57068398  | 0.01048774  | 1 | 29 | C |
| 1.98688507  | 1.48937792  | 0.01203020  | 1 | 30 | C |
| 1.39932776  | 1.45995049  | 0.01534690  | 1 | 31 | C |
| 0.28190199  | 1.49548367  | 0.00332366  | 1 | 32 | C |
| -2.02509102 | 1.50715015  | 0.00068282  | 1 | 33 | C |
| -1.43737941 | 1.50343681  | -0.00384594 | 1 | 34 | C |
| -0.28916518 | 1.52165447  | -0.00428384 | 1 | 35 | C |
| 2.01191392  | -0.46102527 | 0.03796796  | 1 | 36 | C |
| 1.42977169  | -0.33555121 | 0.03382821  | 1 | 37 | C |
| -1.98189823 | -0.48414356 | 0.02400405  | 1 | 38 | C |
| -1.38286415 | -0.47651344 | 0.02003662  | 1 | 39 | C |
| -0.13423221 | -0.55229583 | 0.02062234  | 1 | 40 | C |
| 1.98566205  | -1.46677640 | 0.01817869  | 1 | 41 | C |
| 1.39833497  | -1.43668291 | 0.01986910  | 1 | 42 | C |
| 0.28180834  | -1.47494891 | 0.01112605  | 1 | 43 | C |
| -2.02578959 | -1.48478148 | 0.00886774  | 1 | 44 | C |
| -1.43800939 | -1.48288717 | 0.00579642  | 1 | 45 | C |
| -0.28898177 | -1.50286927 | 0.00598723  | 1 | 46 | C |
